# Supplementary material for: Identifying high-performance and durable methylammonium-free lead halide perovskites via high-throughput synthesis and characterization
Source: Royal Society of Chemistry journal article supplement (doi:10.1039/d1ee02691g), 2021-01-01
Supplement: d1ee02691g1.pdf [file d1ee02691g1.pdf]

# Supporting information

## Identifying high performance and durable methylammonium-free lead halide perovskites through high throughput synthesis and characterization

*Yu An<sup>a, b, c</sup>, Carlo Andrea Riccardo Perini<sup>b</sup>, Juanita Hidalgo<sup>b</sup>, Andrés-Felipe Castro-Méndez<sup>b</sup>,  
Jacob N. Vagott<sup>b</sup>, Ruipeng Li<sup>d</sup>, Wissam Saidi<sup>e</sup>, Shirong Wang<sup>a, c</sup>, Xianggao Li<sup>a, c\*</sup> and Juan-Pablo  
Correa-Baena<sup>b\*</sup>*

*<sup>a</sup> School of Chemical Engineering and Technology, Tianjin University, Tianjin, 300072, China*

*<sup>b</sup> School of Materials Science and Engineering, Georgia Institute of Technology, Atlanta,  
Georgia, 30332, United States*

*<sup>c</sup> Collaborative Innovation Center of Chemical Science and Engineering (Tianjin), Tianjin,  
300072, China*

*<sup>d</sup> National Synchrotron Light Source II, Brookhaven National Lab, Upton, New York, 11973,  
United States*

*<sup>e</sup> Department of Mechanical Engineering and Materials Science, University of Pittsburgh,  
Pittsburgh, PA 15261, USA*

*\*Corresponding Authors: X. Li [lixianggao@tju.edu.cn](mailto:lixianggao@tju.edu.cn); JPCB [jpcorrea@gatech.edu](mailto:jpcorrea@gatech.edu)*

## 22 I. Experimental materials and methods

23

### 24 **Materials**

25 Lead iodide ( $\text{PbI}_2$ ) and lead bromide ( $\text{PbBr}_2$ ) were purchased from TCI America. Formamidinium  
26 iodide (FAI) and formamidinium bromide (FABr) were purchased from Dyenamo. 2,2',7,7'-  
27 Tetrakis[N,N-di(4-methoxyphenyl)amino]-9,9'-spirobifluorene (spiroOMeTAD) was purchased  
28 from 1-Material. Dimethylformamide (DMF), dimethyl sulfoxide (DMSO) and chlorobenzene  
29 (CB) were purchased from Acros Organics. Cesium iodide (CsI), cesium bromide (CsBr), titanium  
30 diisopropoxide bis(acetylacetonate) (75 wt. % in isopropanol), acetylacetone, anhydrous ethanol  
31 (EtOH), titanium dioxide paste ( $\text{TiO}_2$ , 30 NR-D), lithium bistrifluorosulfonyl imide (Li-TFSI),  
32 tris(2-(1H-pyrazol-1-yl)-4-tert-butylpyridine)cobalt(III) tri[bis(trifluoromethane)sulfonimide]  
33 (FK 209 Co(III) TFSI), 4-tertbutyl pyridine (tBP), acetonitrile were bought from Sigma-Aldrich.  
34 Au pellets were purchased from Kurt J. Lesker. All the chemicals were used as received without  
35 further purification. Conductive glass, fluorine-tin-oxide (FTO) coated (10 ohms/sq, 1-inch  $\times$  1-  
36 inch), was purchased from Kintec.

37

### 38 **Perovskite active layer deposition**

39 Preparation of 0.4 M perovskite precursor solutions: Due to the poor solubility of CsBr in DMF  
40 and DMSO, 0.4 M perovskite precursor solutions were prepared for all 49 compositions. Four  
41 master solutions were used to prepare a total of 49 precursor solutions with varying ratios of Cs/FA  
42 and Br/I. The master solutions were 0.4 M  $\text{CsPbI}_3$ ,  $\text{FAPbI}_3$ ,  $\text{CsPbBr}_3$ , and  $\text{FAPbBr}_3$ , which were  
43 synthesized by dissolving stoichiometric CsI and  $\text{PbI}_2$ , FAI and  $\text{PbI}_2$ , CsBr and  $\text{PbBr}_2$ , FABr and  
44  $\text{PbBr}_2$  in DMSO, respectively. The perovskite precursor solutions were prepared in a  $\text{N}_2$  glovebox  
45 with  $< 2$  ppm of  $\text{O}_2$  and  $\text{H}_2\text{O}$  under the mild heating condition at  $\sim 65^\circ\text{C}$  for 1 h to assist dissolving.  
46 These four solutions were mixed in the right molar ratios to yield the other 45 stoichiometric  
47 solutions with the desired  $\text{Cs}_y\text{FA}_{1-y}\text{Pb}(\text{Br}_x\text{I}_{1-x})_3$  compositions.

48 Fabrication of perovskite thin-films from 0.4 M perovskite precursor solutions: The 0.4 M  
49 precursor perovskite solution was freshly spin-coated on a substrate pre-heated at  $65^\circ\text{C}$  by a two-  
50 step spin-coating process, dynamically adding CB as the antisolvent. The first step was carried out  
51 at 500 rpm with an acceleration rate of 250 rpm/s for 10 s. The second step followed at 2000 rpm  
52 with an acceleration rate of 1000 rpm/s for 70 s. CB (250  $\mu\text{L}$ ) was gently dripped at 5 s before the

53 second step end. All films were then annealed at 65°C for 10 min with the exception of CsPbI<sub>3</sub>  
54 (65°C for 1 min).

55 Preparation of 1.0 M perovskite precursor solutions: Four compositions (i.e. Cs<sub>2/6</sub>FA<sub>4/6</sub>PbI<sub>3</sub>,  
56 Cs<sub>2/6</sub>FA<sub>4/6</sub>PbBr<sub>5/2</sub>I<sub>1/2</sub>, Cs<sub>1/6</sub>FA<sub>5/6</sub>PbI<sub>3</sub> and Cs<sub>1/6</sub>FA<sub>5/6</sub>PbBr<sub>5/2</sub>I<sub>1/2</sub>) were selected to increase the  
57 concentration from 0.4 M to 1.0 M to improve the photovoltaic performance. 1 M perovskite  
58 precursor solutions of Cs<sub>2/6</sub>FA<sub>4/6</sub>PbI<sub>3</sub> and Cs<sub>1/6</sub>FA<sub>5/6</sub>PbI<sub>3</sub> were prepared by dissolving a mixture of  
59 PbI<sub>2</sub>, FAI, and CsI with 5% excess stoichiometry of PbI<sub>2</sub> in a mixed solvent of DMF and DMSO  
60 [DMF (v) : DMSO (v) = 4:1]. 1 M perovskite precursor solutions of Cs<sub>2/6</sub>FA<sub>4/6</sub>PbBr<sub>5/2</sub>I<sub>1/2</sub> and  
61 Cs<sub>1/6</sub>FA<sub>5/6</sub>PbBr<sub>5/2</sub>I<sub>1/2</sub> were prepared by dissolving a mixture of PbI<sub>2</sub>, PbBr<sub>2</sub>, FAI, and CsI with 5%  
62 excess stoichiometry of PbI<sub>2</sub> and PbBr<sub>2</sub> in a mixed solvent of DMF and DMSO [DMF (v) : DMSO  
63 (v) = 4:1]. The perovskite precursor solutions were prepared in a N<sub>2</sub> glovebox with < 2 ppm of O<sub>2</sub>  
64 and H<sub>2</sub>O under the mild heating condition at ~70 °C for 1 h to assist dissolving.

65 Fabrication of perovskite thin-films from 1.0 M perovskite precursor solutions: The 1.0 M  
66 precursor perovskite solution was spin-coated on the substrate. Spin-coating parameters are two  
67 steps, 1000rpm 10 seconds (1000 rpm/s) followed by 6000rpm 20 seconds (2000 rpm/s). CB was  
68 gently added 5 s before the end of the second step. The films were then annealed at 150 °C for 10  
69 min.

70

## 71 **Device fabrication**

72 Etched FTO-coated glass was sequentially cleaned by sonication in a detergent solution (2%  
73 Hellmanex in deionized water), deionized water, acetone, and isopropanol for 15 min to each  
74 solvent. After drying with N<sub>2</sub>, the substrates were treated under ultraviolet-ozone for 15 min to  
75 remove the last traces of organic residues before the deposition of the electron-transporting layer.  
76 A compact TiO<sub>2</sub> (c-TiO<sub>2</sub>) layer was deposited on the top of FTO-coated glass by spray pyrolysis  
77 of a precursor solution of 480 μL acetylacetone and 720 μL titanium diisopropoxide  
78 bis(acetylacetonate) (75 wt. % in isopropanol) diluted in 10.8 mL of anhydrous ethanol. The  
79 solution was sprayed on the substrates preheated at 450 °C using O<sub>2</sub> as the carrier gas with a 30 s  
80 interval between each cycle. The FTO/c-TiO<sub>2</sub> substrates were kept at 450 °C for 30 minutes after  
81 finishing the spray procedure then left cool down to ambient temperature. Next, a mesoporous  
82 TiO<sub>2</sub> (m-TiO<sub>2</sub>) layer was coated on the top of the FTO/c-TiO<sub>2</sub> substrate by spin-coating a 150  
83 mg/mL diluted TiO<sub>2</sub> paste (30 NR-D) in anhydrous ethanol for 10 s at 4000 rpm with a ramp rate

84 of 4000 rpm s<sup>-1</sup>. After drying at 100 °C, the as-prepared FTO/c-TiO<sub>2</sub>/m-TiO<sub>2</sub> stack was sintered at  
85 450 °C for 30 min. The perovskite layer was deposited on the substrate right after completing the  
86 annealing process. A perovskite active layer was deposited by spin-coating a perovskite precursor  
87 solution in a N<sub>2</sub> glovebox as mentioned in the “Perovskite active layer deposition” section. The  
88 hole-transporting layer was deposited by spin-coating a solution consisting of 91.4 mg of Spiro-  
89 OMeTAD, 36.1 μL of tBP, 20.7 μL Li-TFSI (1.8 M in acetonitrile), 9.0 μL of Co(III) TFSI solution  
90 (0.25 M in acetonitrile), and 1 mL CB. The concentration of Spiro-OMeTAD solution was 70 mM  
91 and the molar ratio of Spiro-OMeTAD : Co(III) TFSI : Li-TFSI : tBP was 1 : 0.03 : 0.5 : 3.3. The  
92 80 μL doped Spiro-OMeTAD solution was dynamically spin-coated on the surface of the  
93 perovskite layer at 3000 rpm for 30 s with the ramp of 3000 rpm/s. Finally, 80 nm of Au electrode  
94 was thermally evaporated on the top of the Spiro-OMeTAD layer. The evaporation rate was  
95 adjusted to 0.01 Å s<sup>-1</sup> at the first 1 nm, 0.05 Å s<sup>-1</sup> for the thickness between 1 nm and 5 nm, 0.1 nm  
96 s<sup>-1</sup> for the thickness between 5 nm and 20 nm, and 0.5 Å s<sup>-1</sup> for the rest 60 nm.

97

## 98 **Characterization**

99 UV-vis absorption measurements were performed on a Varian Cary 5000 UV-Vis/NIR  
100 spectrometer with a dual-beam. Steady-state photoluminescence was measured using a Horiba  
101 Jobin Yvon Fluorolog 3-2iHR1 fluorometer with a 450 W xenon lamp as the excitation source.  
102 The films were oriented at 60° relative to the excitation source to decrease interference from  
103 reflected light. Perovskite films for UV-vis absorption and photoluminescence measurements were  
104 encapsulated with epoxy resin to prevent degradation due to the exposure to ambient atmosphere.  
105 The surface morphology of perovskite films was characterized by a high-resolution field emission  
106 scanning electron microscope (SEM, Hitachi SU8010) operating at 5 keV and 10 μA. X-ray  
107 diffraction (XRD) patterns were recorded in ambient using Malvern PANalytical Empyrean with  
108 Cu<sub>Kα</sub> radiation (1.54 Å wavelength). The XRD patterns were collected in Bragg-Brentano  
109 geometry from 2θ = 5-65°. Grazing incidence wide-angle X-ray scattering (GIWAXS)  
110 measurements were performed at beamline 11-BM of the National Synchrotron Light Source II at  
111 Brookhaven national laboratory. The X-ray beam had an energy of 13.5 keV, 0.2 mm (height) x  
112 0.05 mm (width) size, 1 mrad divergence and an energy resolution of 0.7%. The perovskite films  
113 deposited on glass with a size of about 0.5 cm × 0.5 cm were measured at an incidence angle of



0.5° with respect to the substrate plane and an exposure time of 10 s. Data were analyzed based on the SciAnalysis package provided by the beamline. Current-voltage characteristics were acquired using the Litos Lite characterization system (FLUXiM AG, Switzerland) using the Sinus 70 solar simulator as light source, which is state-of-the-art LED solar simulator with AM1.5G spectrum. The solar cells made from 0.4 M perovskite precursor solutions were encapsulated with epoxy resin while the solar cells made from 1.0 M perovskite precursor solutions were not encapsulated. The solar cells were masked with a black metal mask with a pixel area of 0.0625 cm<sup>2</sup> and were measured in a forward and reverse bias at a scan rate of 10 mV/s under ambient conditions. External quantum efficiency was recorded with a home-built setup, composed of a tungsten-halogen lamp and of an Oriel Apex monochromator illuminator, which were coupled with a Keithley 2300 and calibrated with a Newport silicon photodiode (UV818). The maximum power point (MPP) tracking also was collected for 60 s after measuring current-voltage characteristics under AM1.5G illumination. The stability measurements of the solar cells were performed by Litos system (FLUXiM AG) under a white light-emitting diode with 100 W/m<sup>2</sup> light intensity. Aging was implemented under a continuous flow of N<sub>2</sub> in a closed box at 25 °C and no additional encapsulation was used. The active area of device for aging was 0.128 cm<sup>2</sup>.

131

## 132 **Computational Approach**

The first-principles density-functional theory (DFT) calculations were carried out within the Perdew-Burke-Ehrenzof exchange-correlation functional revised for solids (PBEsol)<sup>1</sup> and projector augmented wave (PAW) pseudopotentials<sup>2,3</sup> as implemented in the Vienna Ab initio Simulation Package (VASP) package. Due to importance of van der Waals interactions in the hybrid perovskites<sup>4</sup>, we applied Tkatchenko-Scheffler scheme<sup>5,6</sup>. Computational setup including planewave cutoff, kgrid and energy tolerances are properly chosen as tested before<sup>7</sup>. The pure and mixed perovskite phases are modeled using a supercell approach, namely employing a 2×3×1 for the cubic and tetragonal phase and 1×3×1 for the orthorhombic phase. These supercells allow to realize the different compositions synthesized experimentally. Starting from the CsPbI<sub>3</sub>, the mixed phase is realized using appropriate Cs for FA or I for Br random substitutions. The organic molecule is inserted with a random orientation in the supercell. Hybrid perovskites are known to have a complex potential energy surface with multiple minima.<sup>8</sup> Thus, in our structural

145 optimization, we relaxed the atomic positions and the lattice cell while constraining the system to  
146 maintain the initial lattice symmetry.

147 **II. Supplementary figures and tables**

**A**

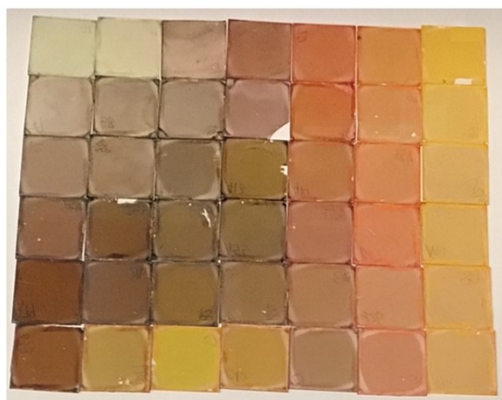

**B**

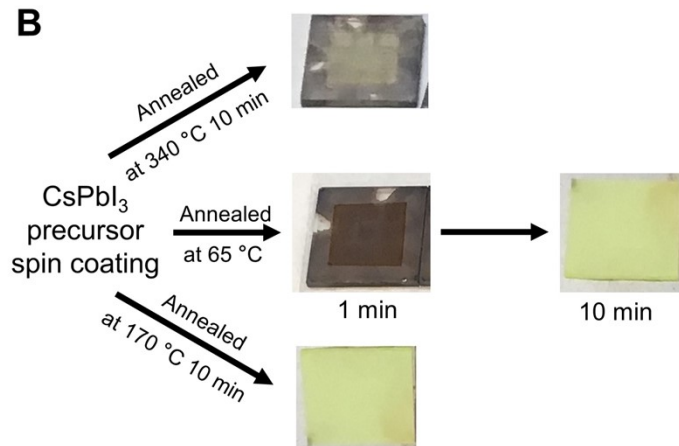

148

149 Fig. S1 (A) Photograph of the perovskite films (No.8-No.49) annealed at 170 °C for 10 min  
150 arranged in the same order as in the composition matrix of Fig. 1A. (B) The different colors of  
151 CsPbI<sub>3</sub> films annealed at different temperatures.

## 153 Crystallographic properties

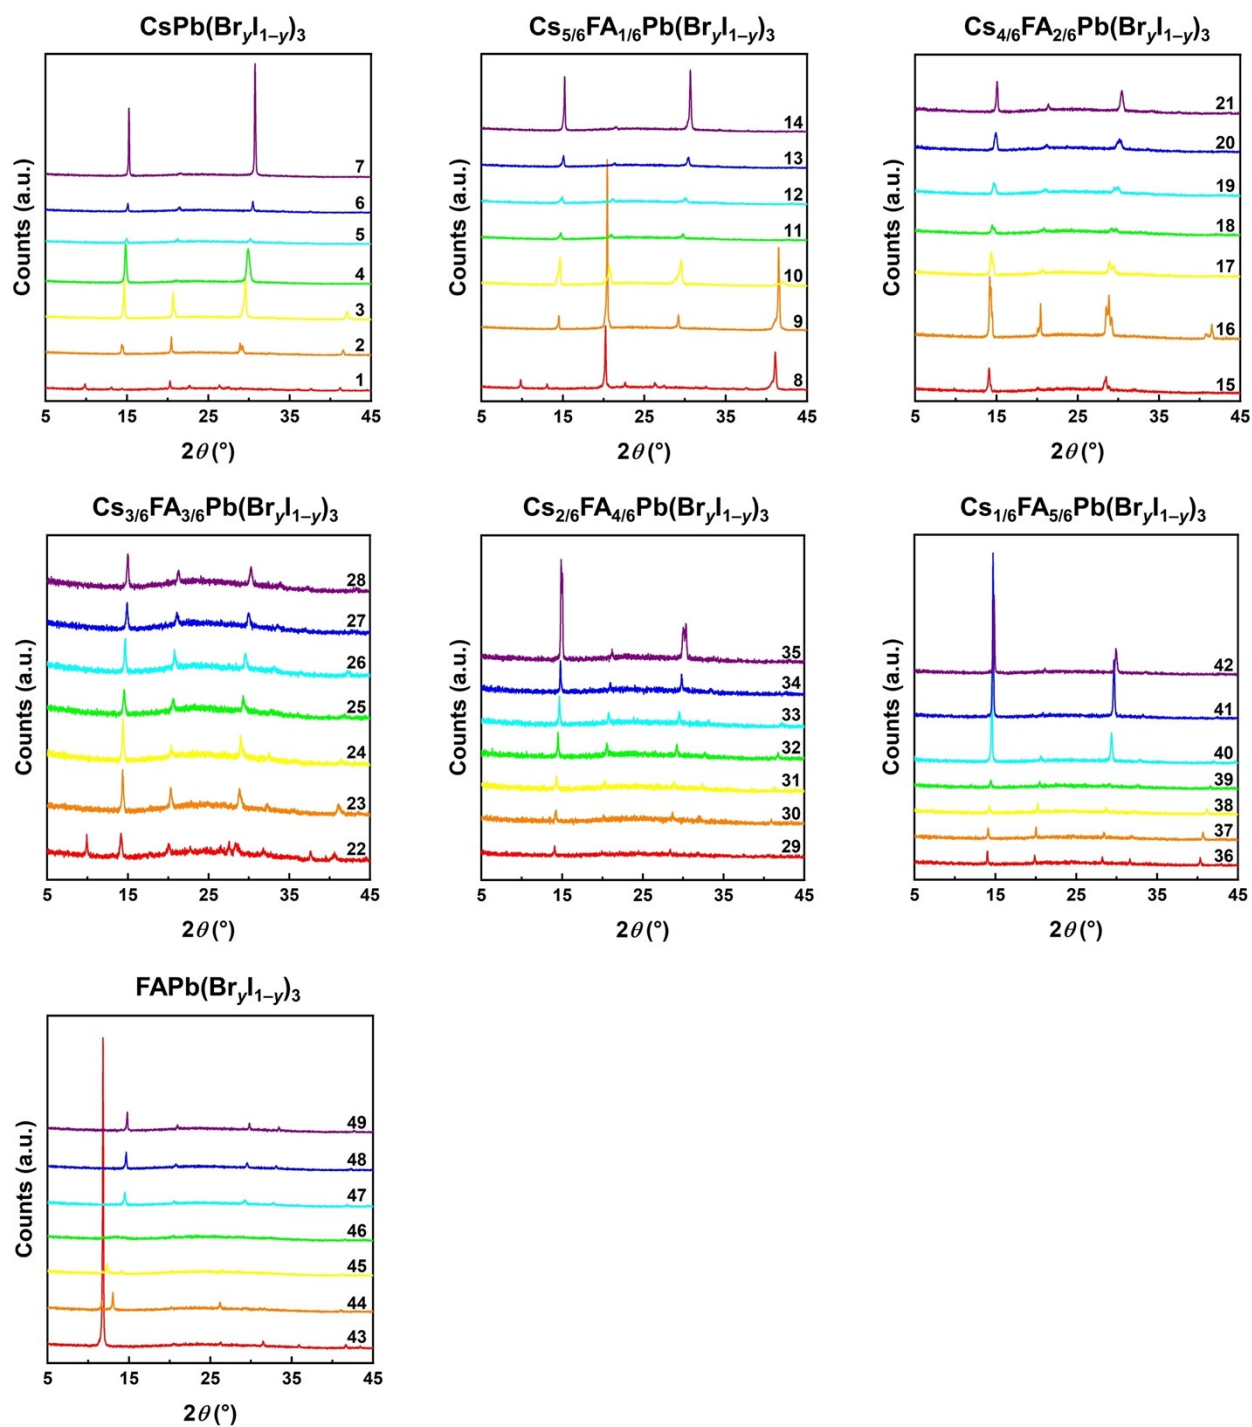

154  
155 Fig. S2 XRD pattern of 49 compositions compared for the halide ratio. Each figure represents a  
156 fixed Cs/FA ratio and a changing Br/I ratio, i.e. every row of the composition matrix.

157

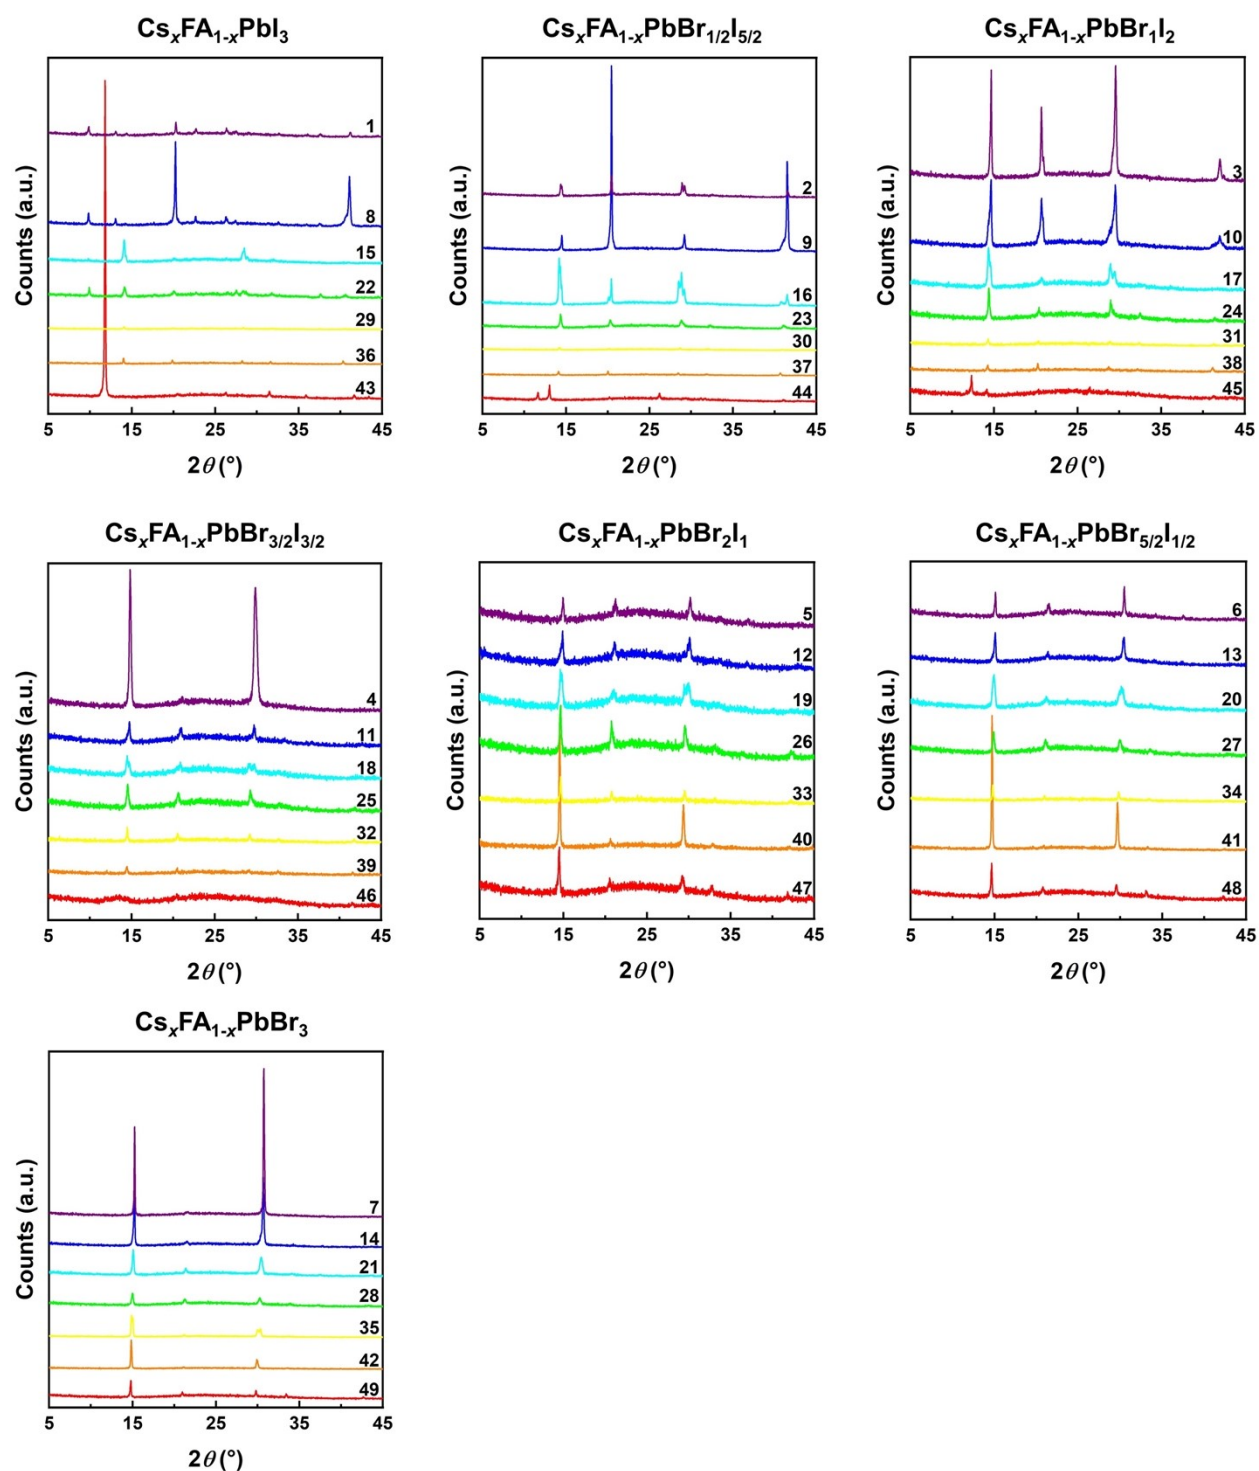

158

159 Fig. S3 XRD pattern of 49 compositions compared for the Cs/FA ratio. Each figure represents a  
 160 fixed Br/I ratio and a changing Cs/FA ratio, i.e. every column of the composition matrix.

161

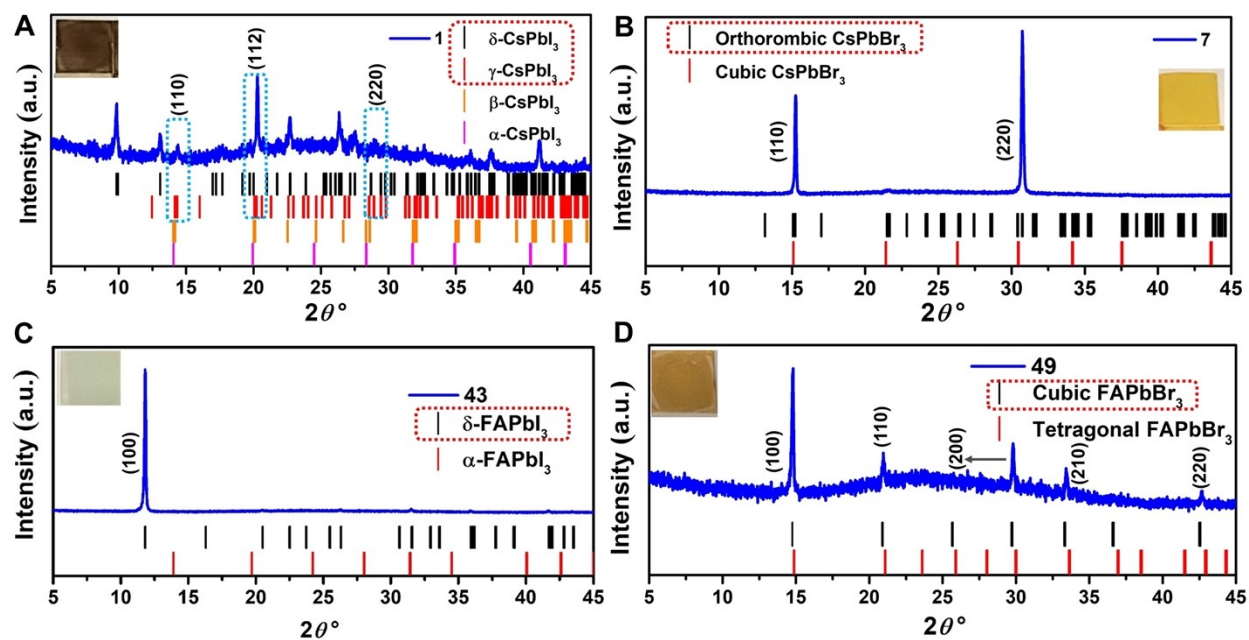

162

163 Fig. S4 XRD patterns of four corner compounds, i.e., CsPbI<sub>3</sub> (A), CsPbBr<sub>3</sub> (B), FAPbI<sub>3</sub> (C), and  
 164 FAPbBr<sub>3</sub> (D), compared with the calculated XRD peaks from Vesta software. The crystallographic  
 165 information files were retrieved from references <sup>9–13</sup>.

166

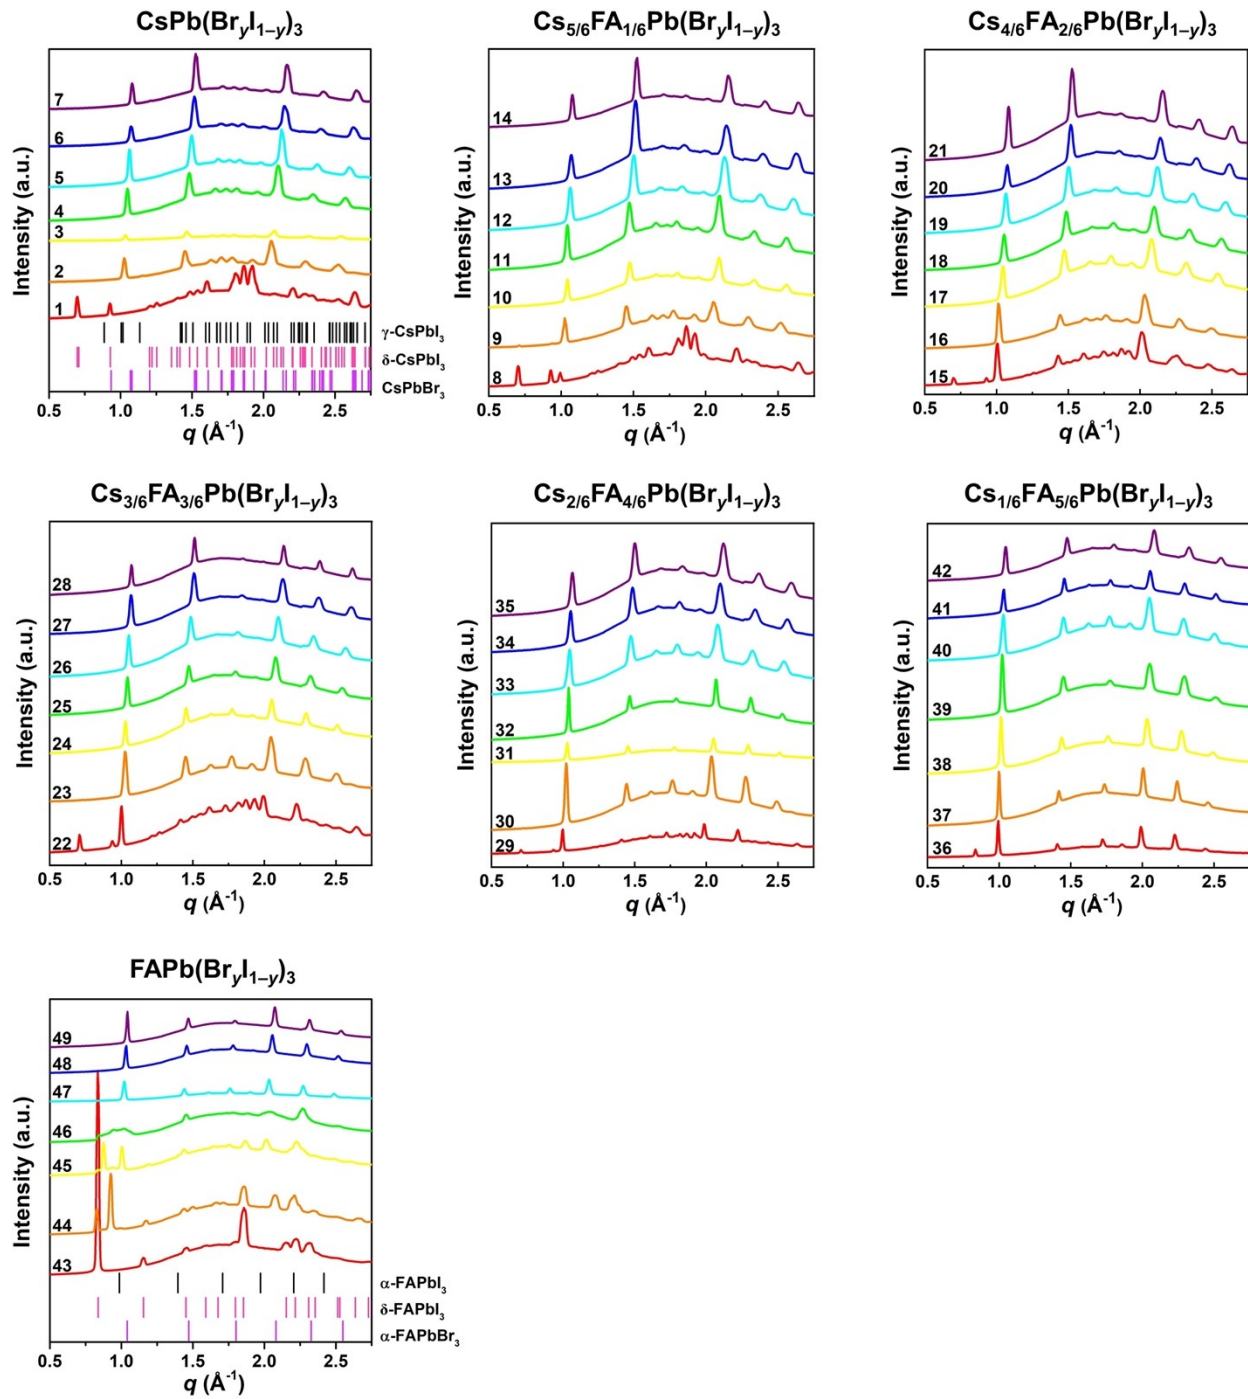

167

168 Fig. S5 Circular average of GIWAXS patterns compared for the halide ratio. Each figure represents  
 169 a fixed Cs/FA ratio and a changing Br/I ratio, i.e. every row of the composition matrix.

170



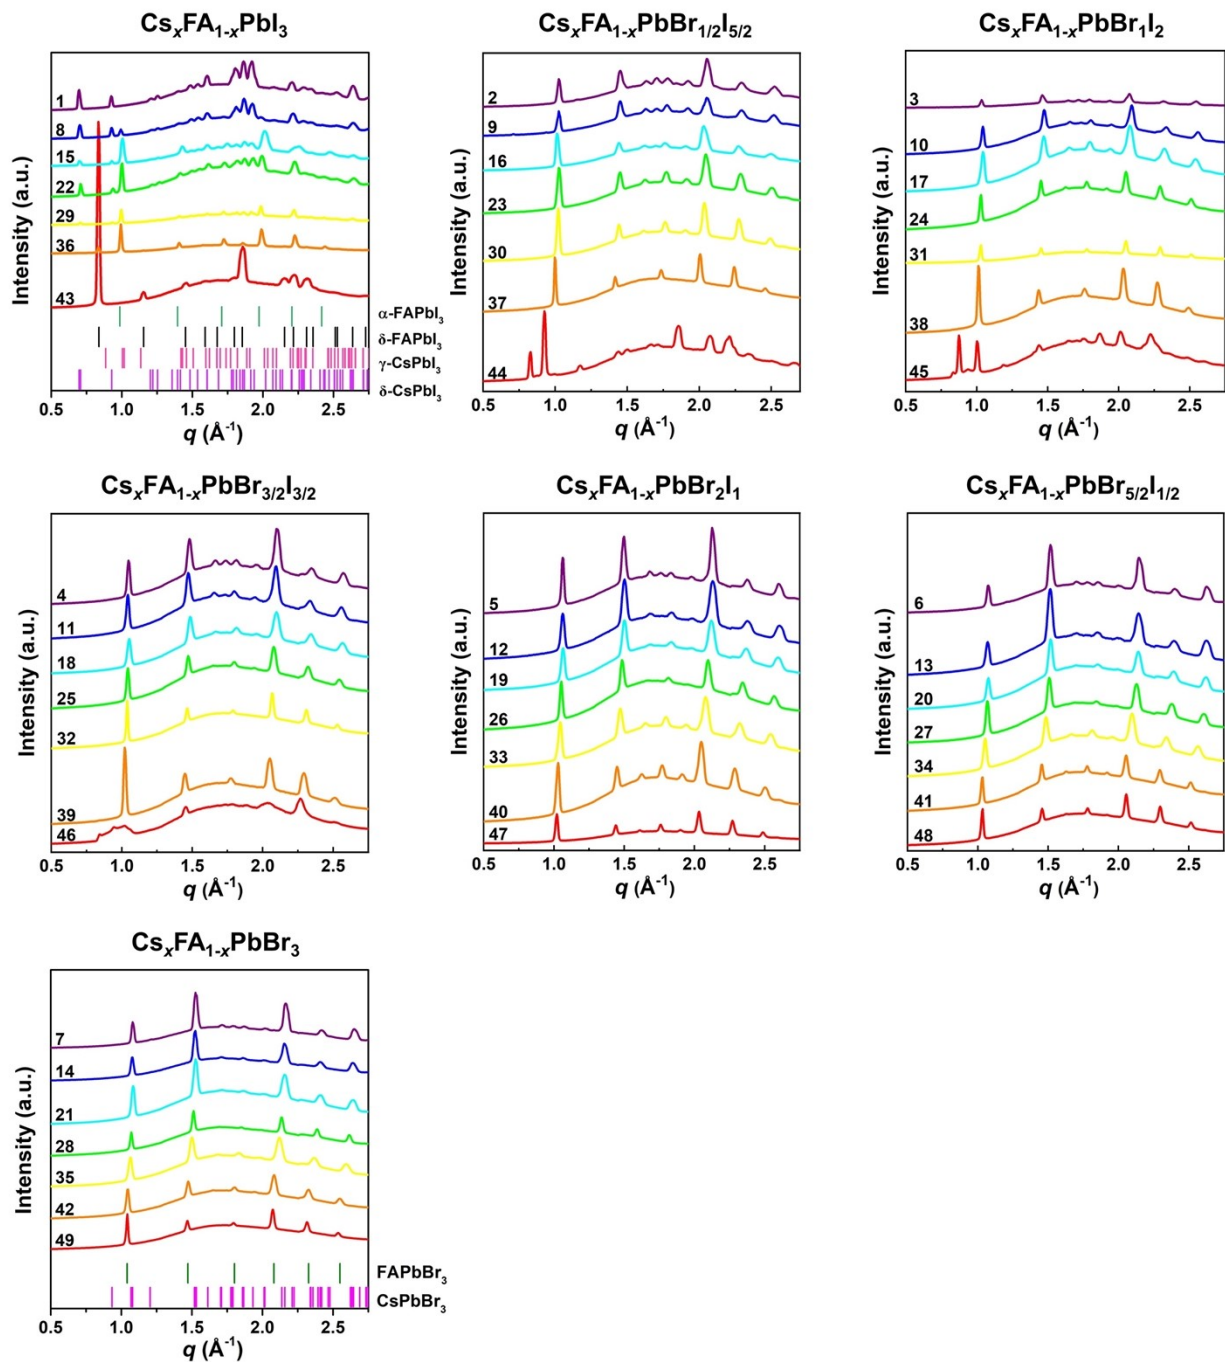

171

172 Fig. S6 Circular average of GIWAXS patterns compared for the Cs/FA ratio. Each figure  
 173 represents a fixed Br/I ratio and a changing Cs/FA ratio, i.e. every column of the composition  
 174 matrix.

175



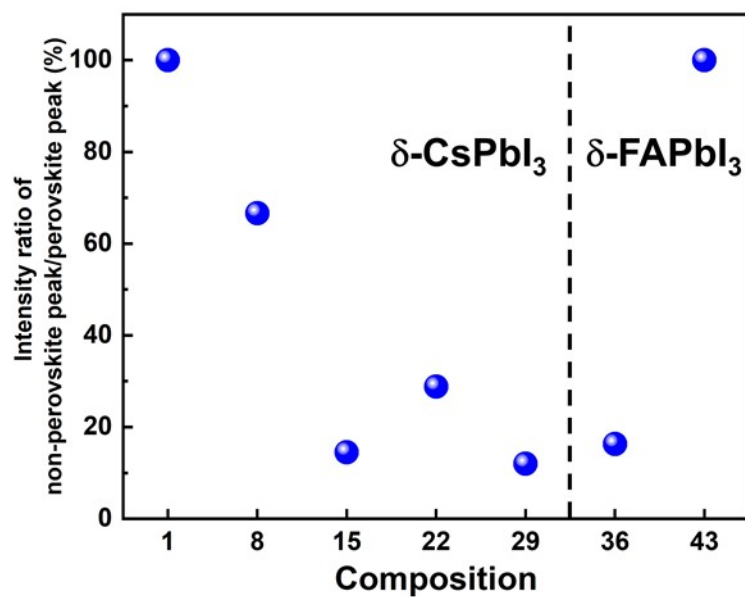

176

177 Fig. S7 The calculated intensity ratio of the characteristic peak at  $q = 0.70 \text{ \AA}^{-1}$  ( $\delta\text{-CsPbI}_3$ ) or  $q =$   
 178  $0.83 \text{ \AA}^{-1}$  ( $\delta\text{-FAPbI}_3$ ) for non-perovskite phase over characteristic peak at  $q$  around  $1.00 \text{ \AA}^{-1}$  of  
 179 perovskite phase for  $\text{Cs}_y\text{FA}_{1-y}\text{PbI}_3$  compositions based on GIWAXS data.

180

181

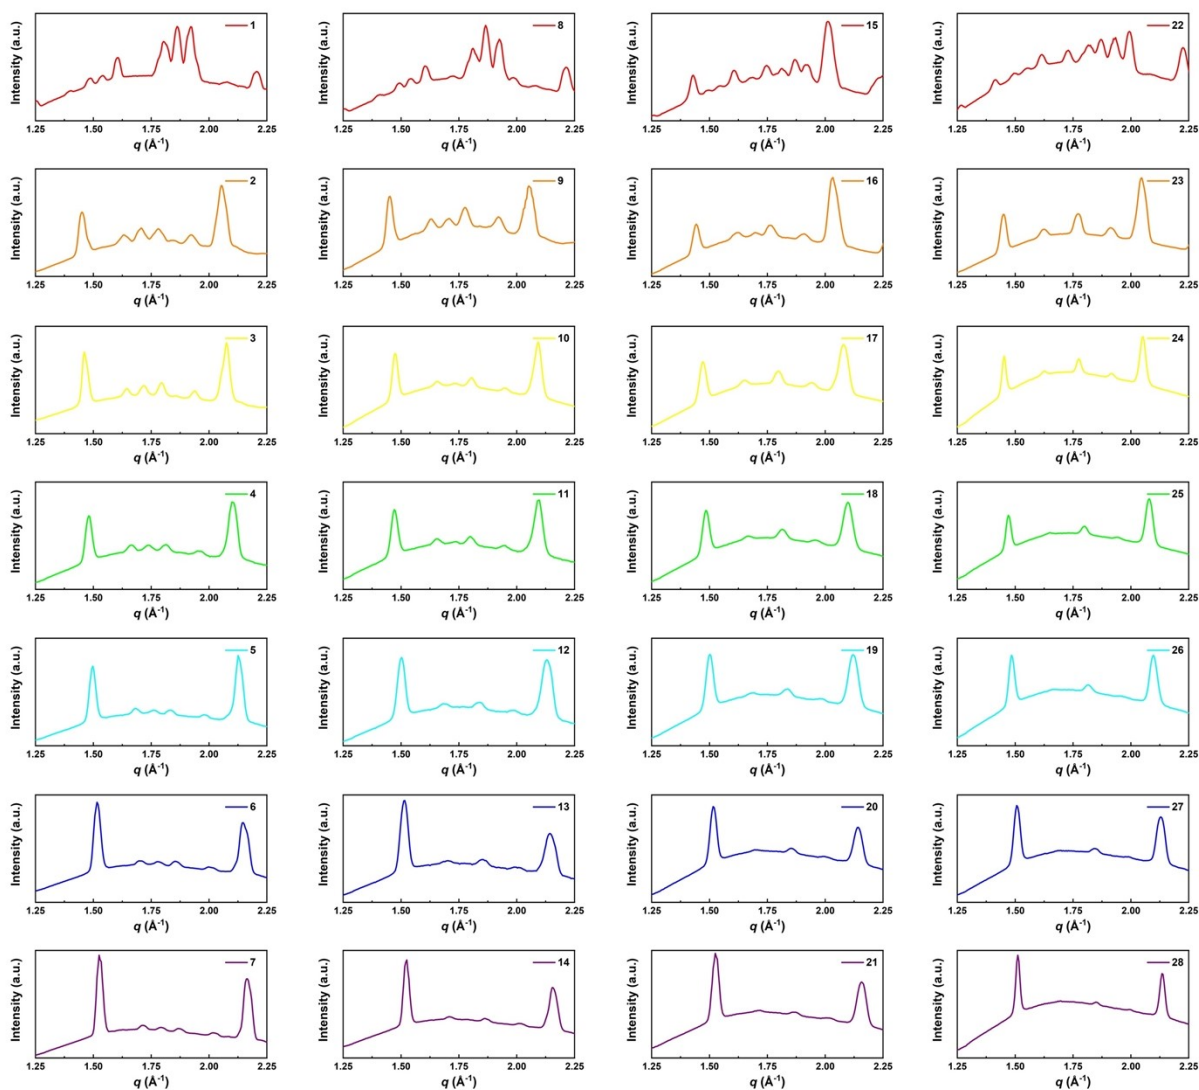

182

183 Fig. S8-1 Enlarged circular average of GIWAXS patterns from  $q = 1.25$ - $2.25 \text{ \AA}^{-1}$  for composition

184 No.1-28.

185

186

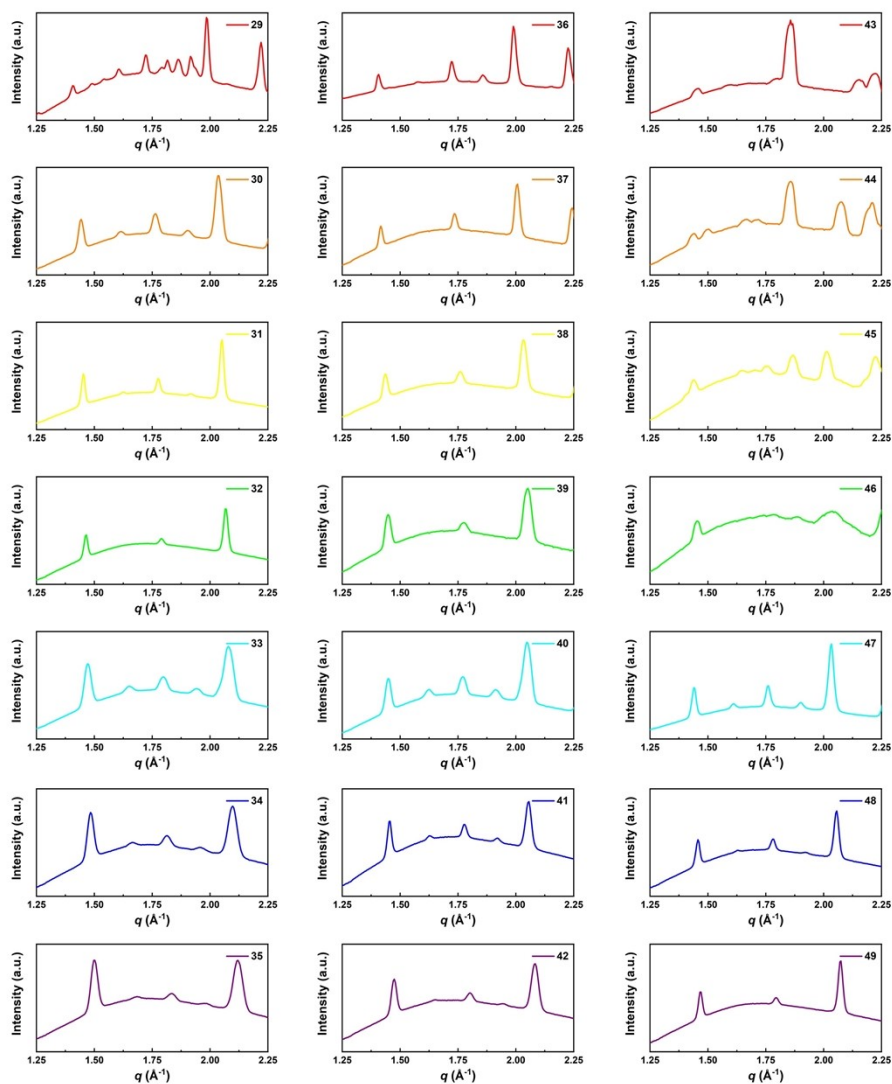

187

188 Fig. S8-2 Enlarged circular average of GIWAXS patterns from  $q = 1.25$ - $2.25 \text{ \AA}^{-1}$  for composition

189 No.29-49.

190

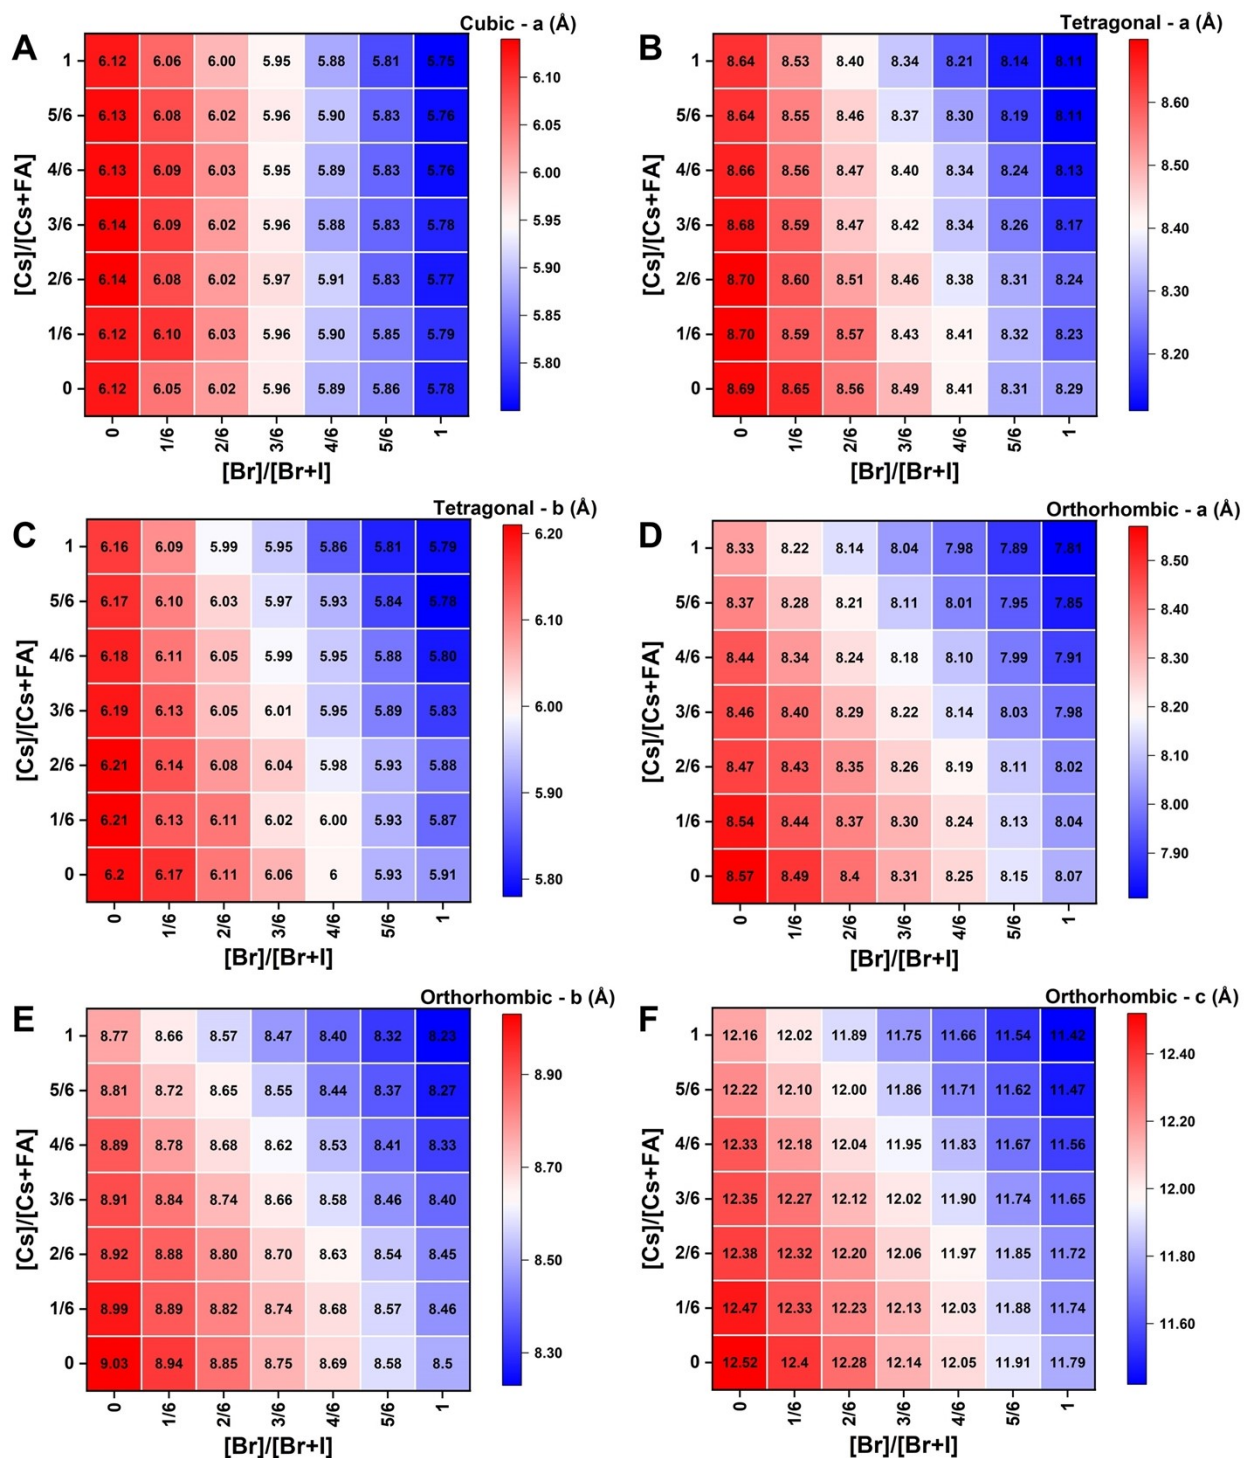

192

193 Fig. S9 The optimized lattice constants for all 49 compositions and for the three phases cubic (A),  
 194 tetragonal (B and C), and orthorhombic (D-E) calculated by DFT.

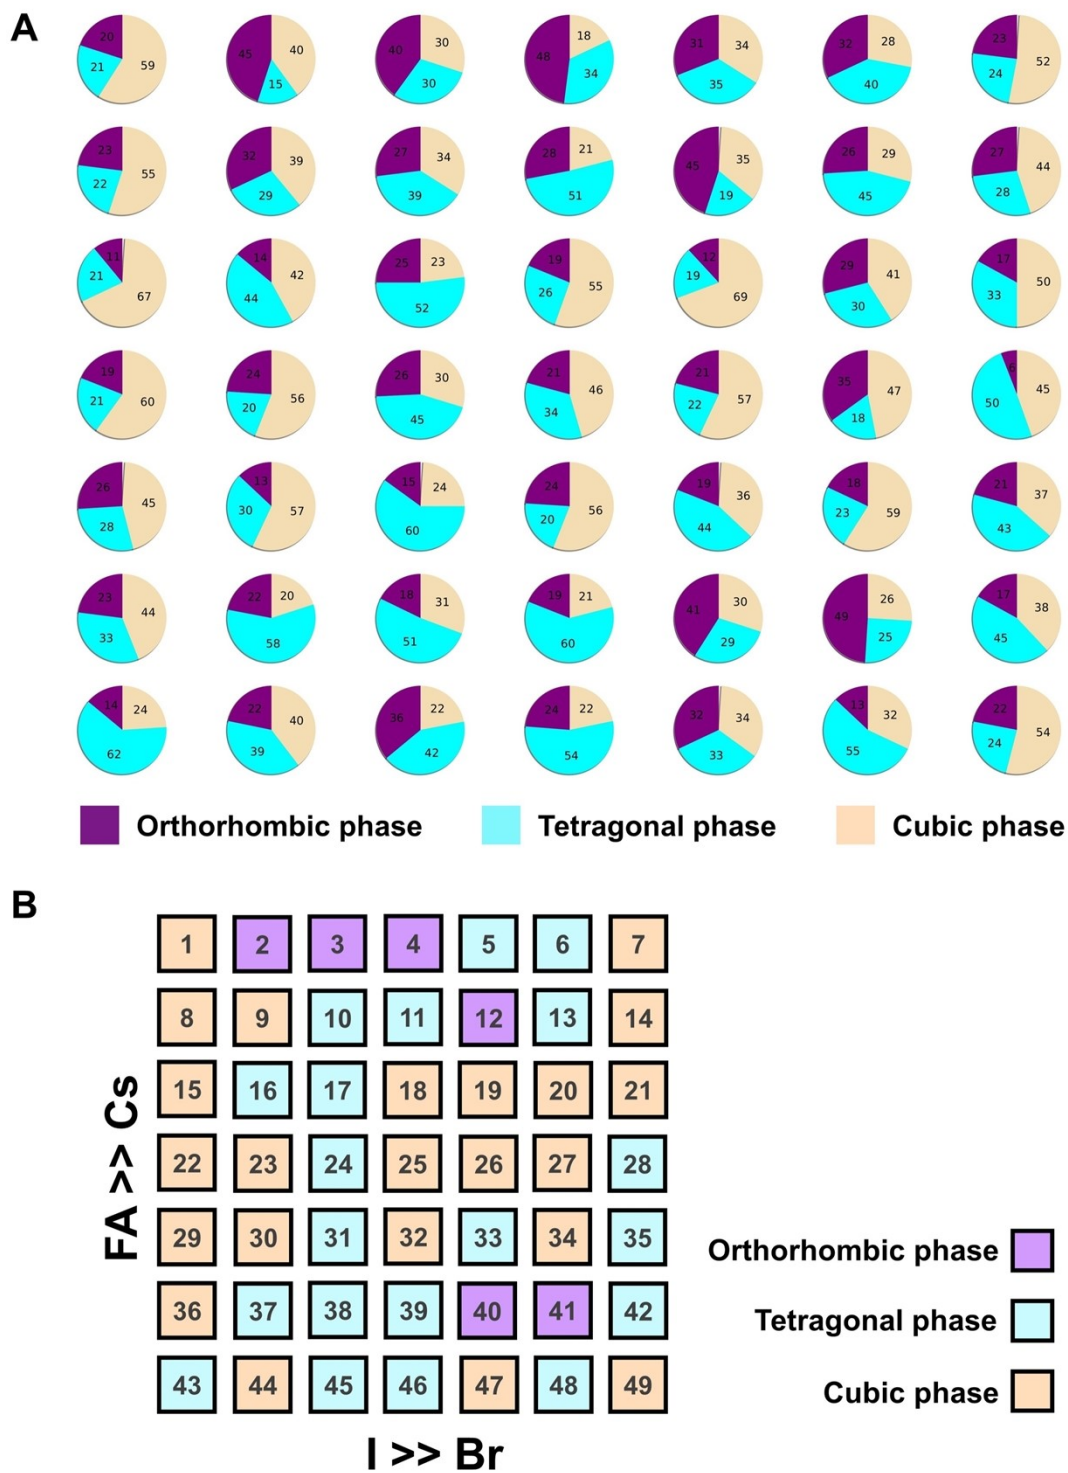

195

196 Fig. S10 (A) Thermodynamic stability based on Boltzmann distribution at  $T = 300^\circ\text{C}$  among cubic,  
 197 tetragonal and orthorhombic phases for each composition arranged in the same order as in the  
 198 composition matrix of Fig. 1A. (B) Color map of thermodynamically stable phase at room  
 199 temperature summarized based on Fig. S9A.

## 200 Surface morphology

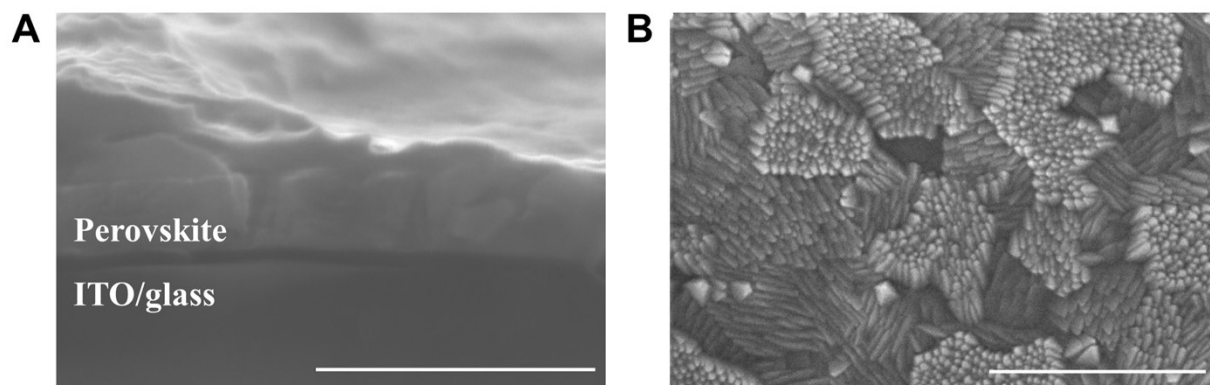

201

202 Fig. S11 (A) SEM image of cross-section view of ITO/perovskite layer. The composition of the  
203 perovskite layer is  $\text{Cs}_{1/6}\text{FA}_{5/6}\text{PbI}_3$ . (B) SEM image of the top view of the bare ITO substrate. The  
204 white scale bar in these two SEM images are 500 nm.

205



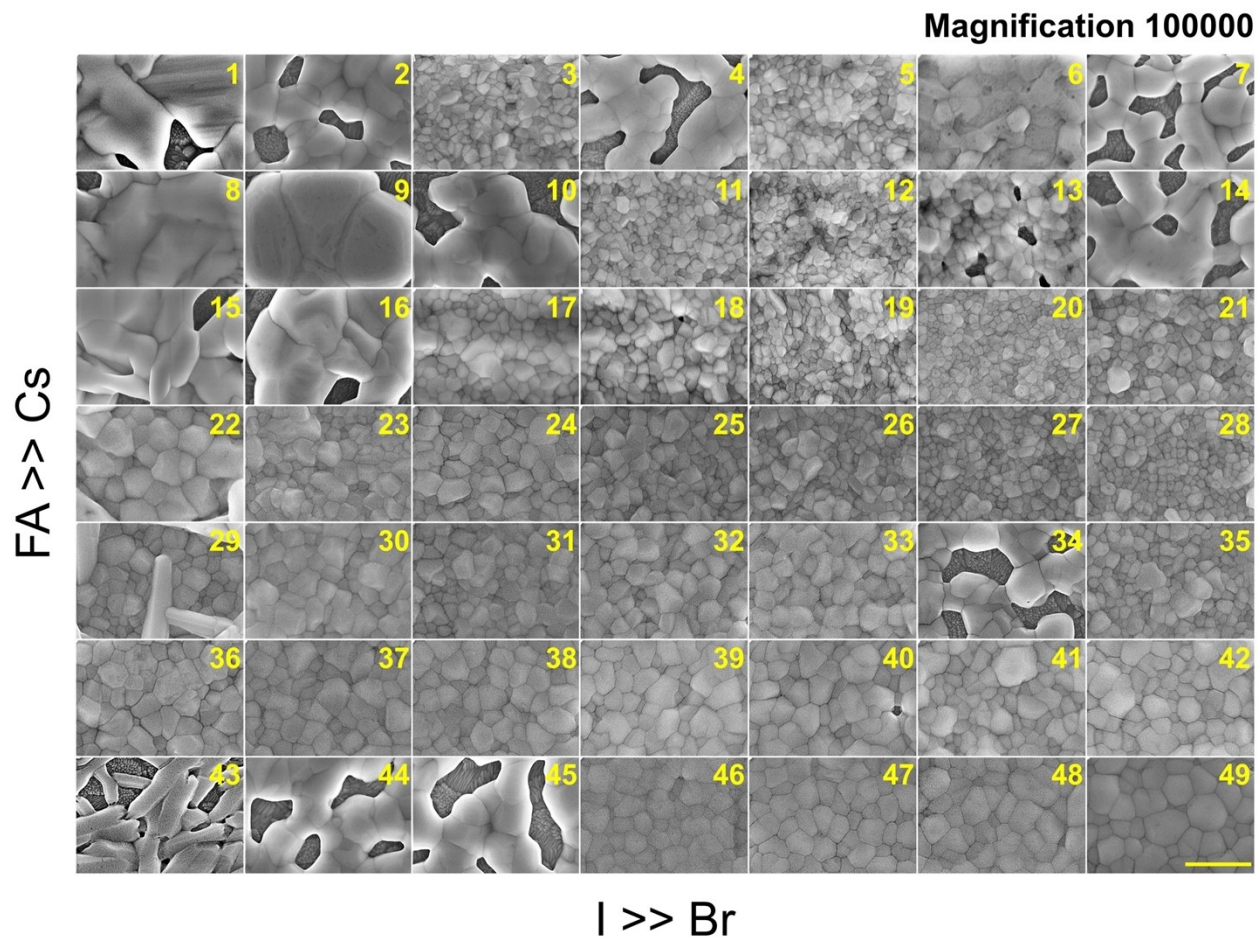

206

207 Fig. S12 SEM images of the perovskite films in the  $\text{Cs}_y\text{FA}_{1-y}\text{Pb}(\text{Br}_x\text{I}_{1-x})_3$  compositional space. The

208 panels are arranged in the same order as in the composition matrix of Fig. 1A in the main text. The

209 yellow scale bar on the right bottom is 500 nm.

210

211

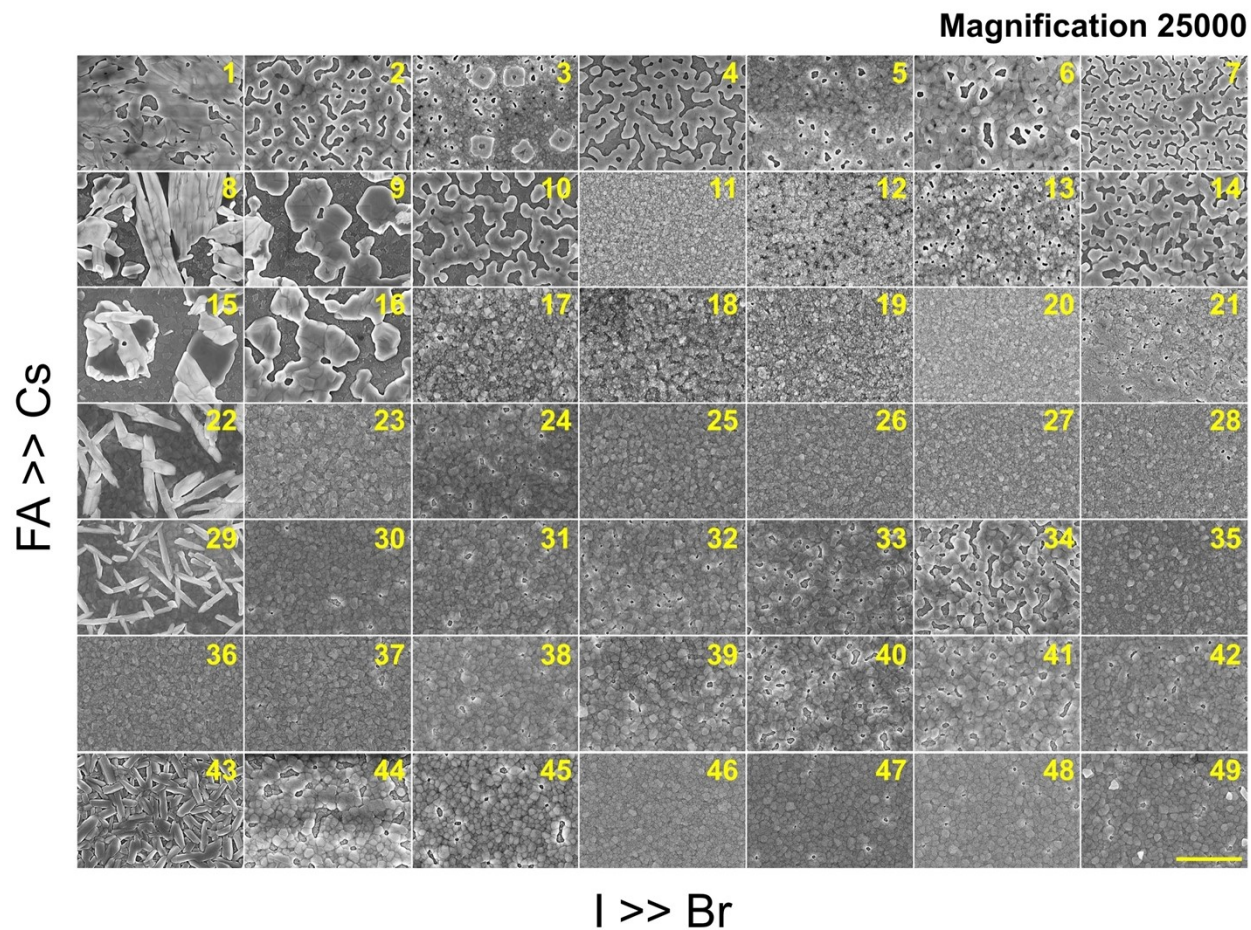

212

213 Fig. S13 SEM images of the perovskite films in the  $\text{Cs}_y\text{FA}_{1-y}\text{Pb}(\text{Br}_x\text{I}_{1-x})_3$  compositional space. The  
 214 panels are arranged in the same order as in the composition matrix of Fig. 1A in the main text. The  
 215 yellow scale bar on the right bottom is 2  $\mu\text{m}$ .

216

217



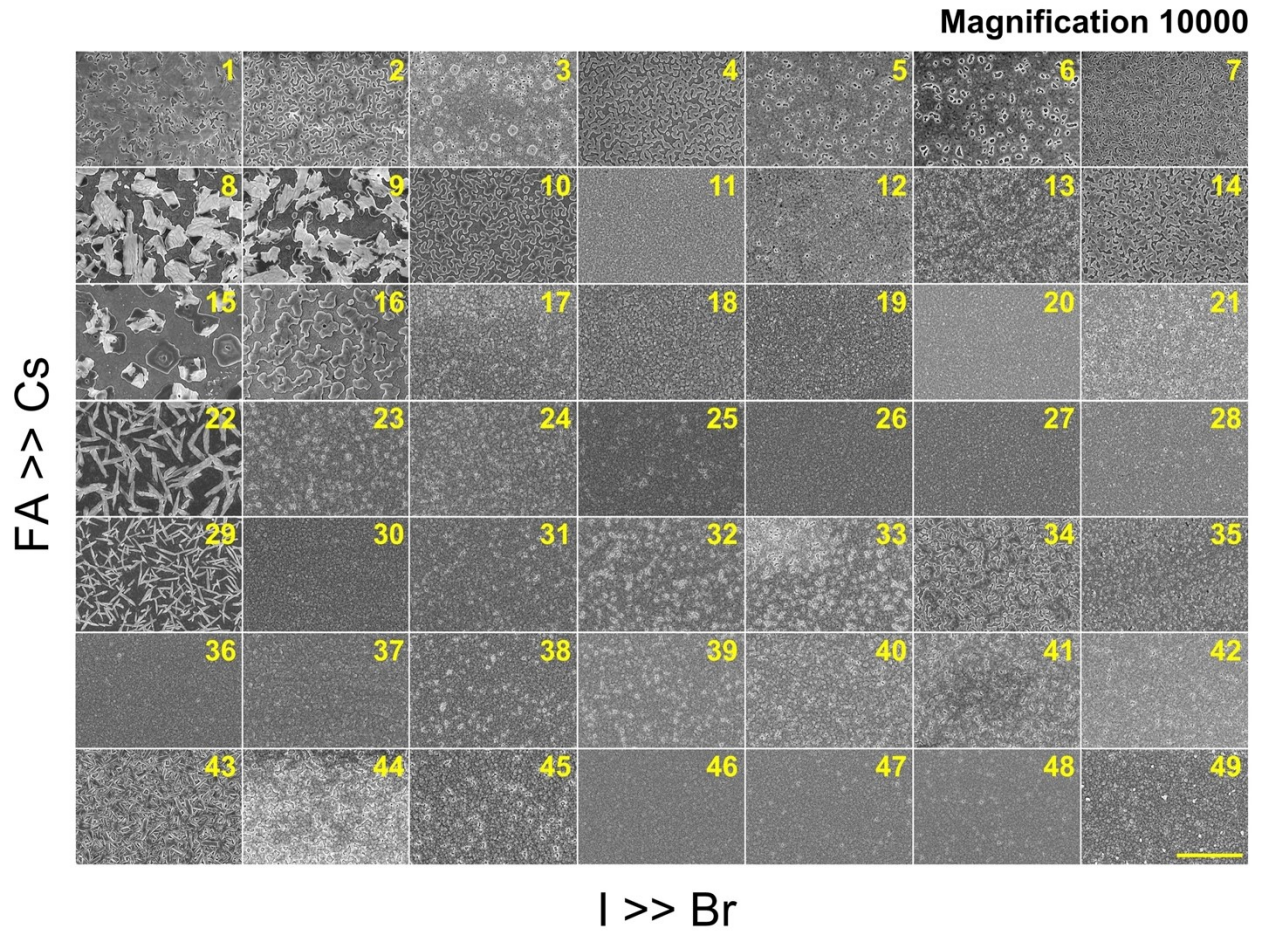

218

219 Fig. S14 SEM images of the perovskite films in the  $\text{Cs}_y\text{FA}_{1-y}\text{Pb}(\text{Br}_x\text{I}_{1-x})_3$  compositional space. The  
 220 panels are arranged in the same order as in the composition matrix of Fig. 1A in the main text. The  
 221 yellow scale bar on the right bottom is 5  $\mu\text{m}$ .

222

223 **Optical properties**

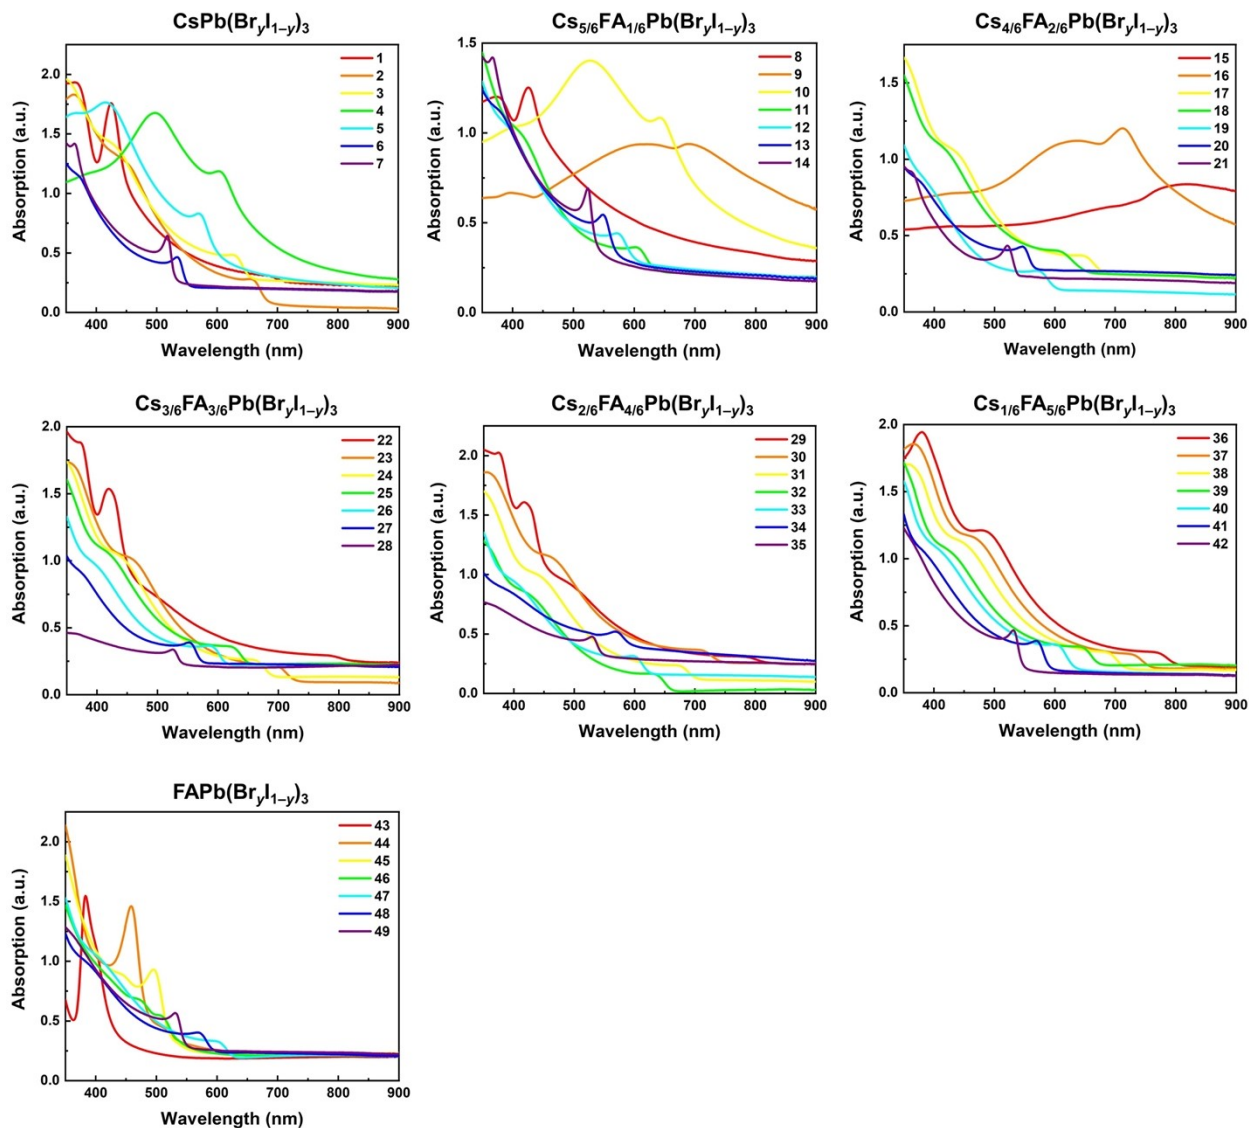

224  
225 Fig. S15 Ultraviolet-visible absorbance as a function of wavelength. Each figure represents a fixed  
226 Cs/FA ratio and a changing Br/I ratio, i.e. every row of the composition matrix.  
227

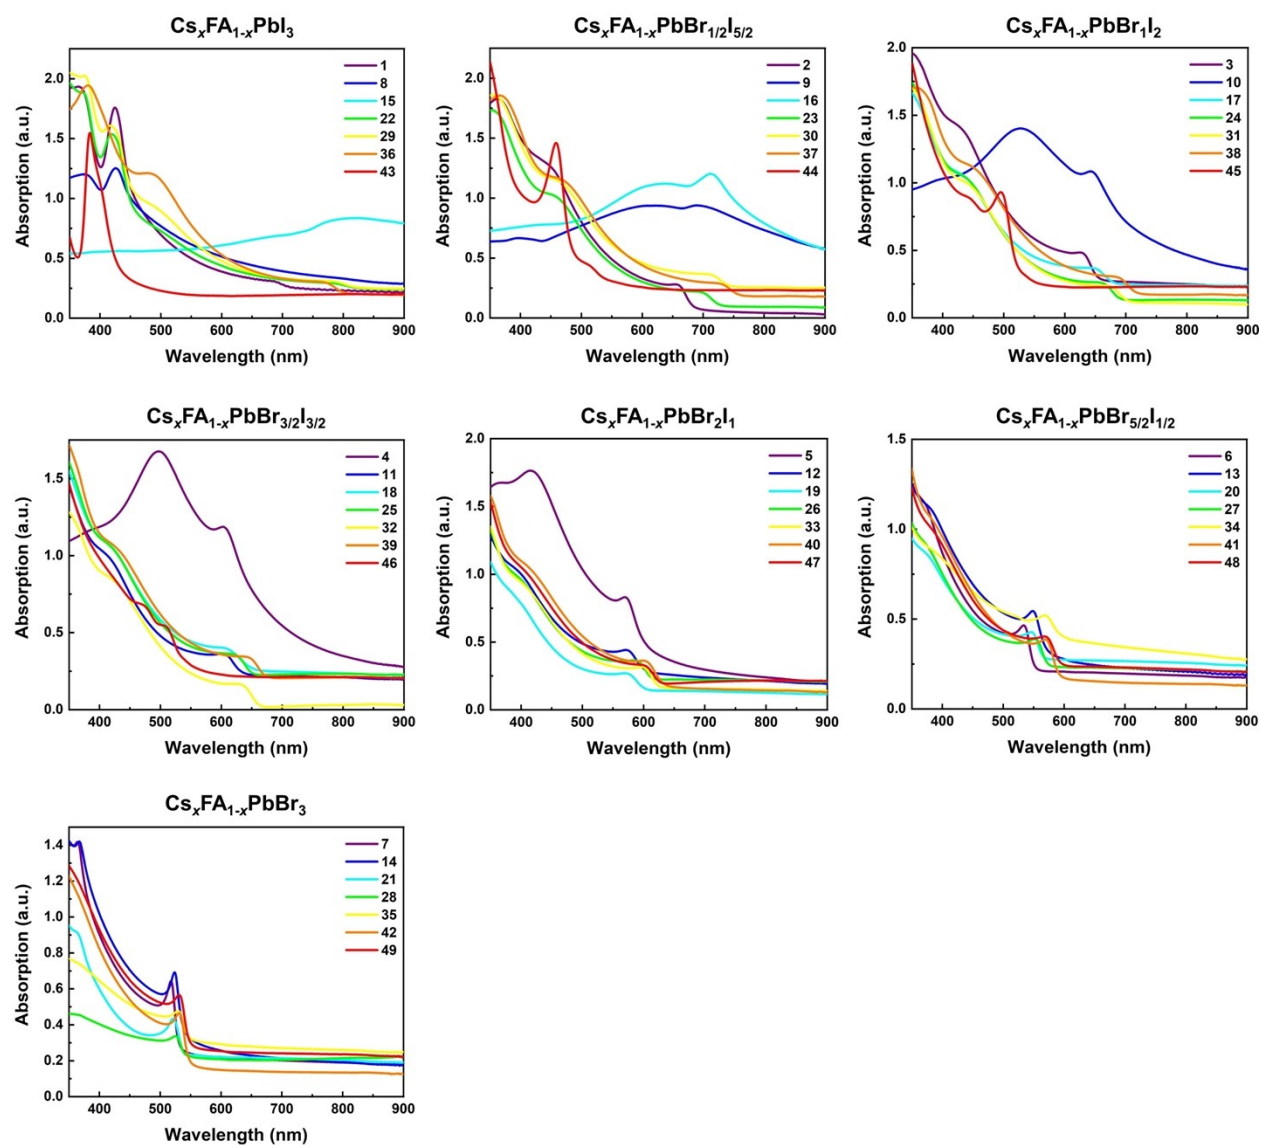

228

229 Fig. S16 Ultraviolet-visible absorbance as a function of wavelength. Each figure represents a fixed  
 230 Br/I ratio and a changing Cs/FA ratio, i.e. every column of the composition matrix.



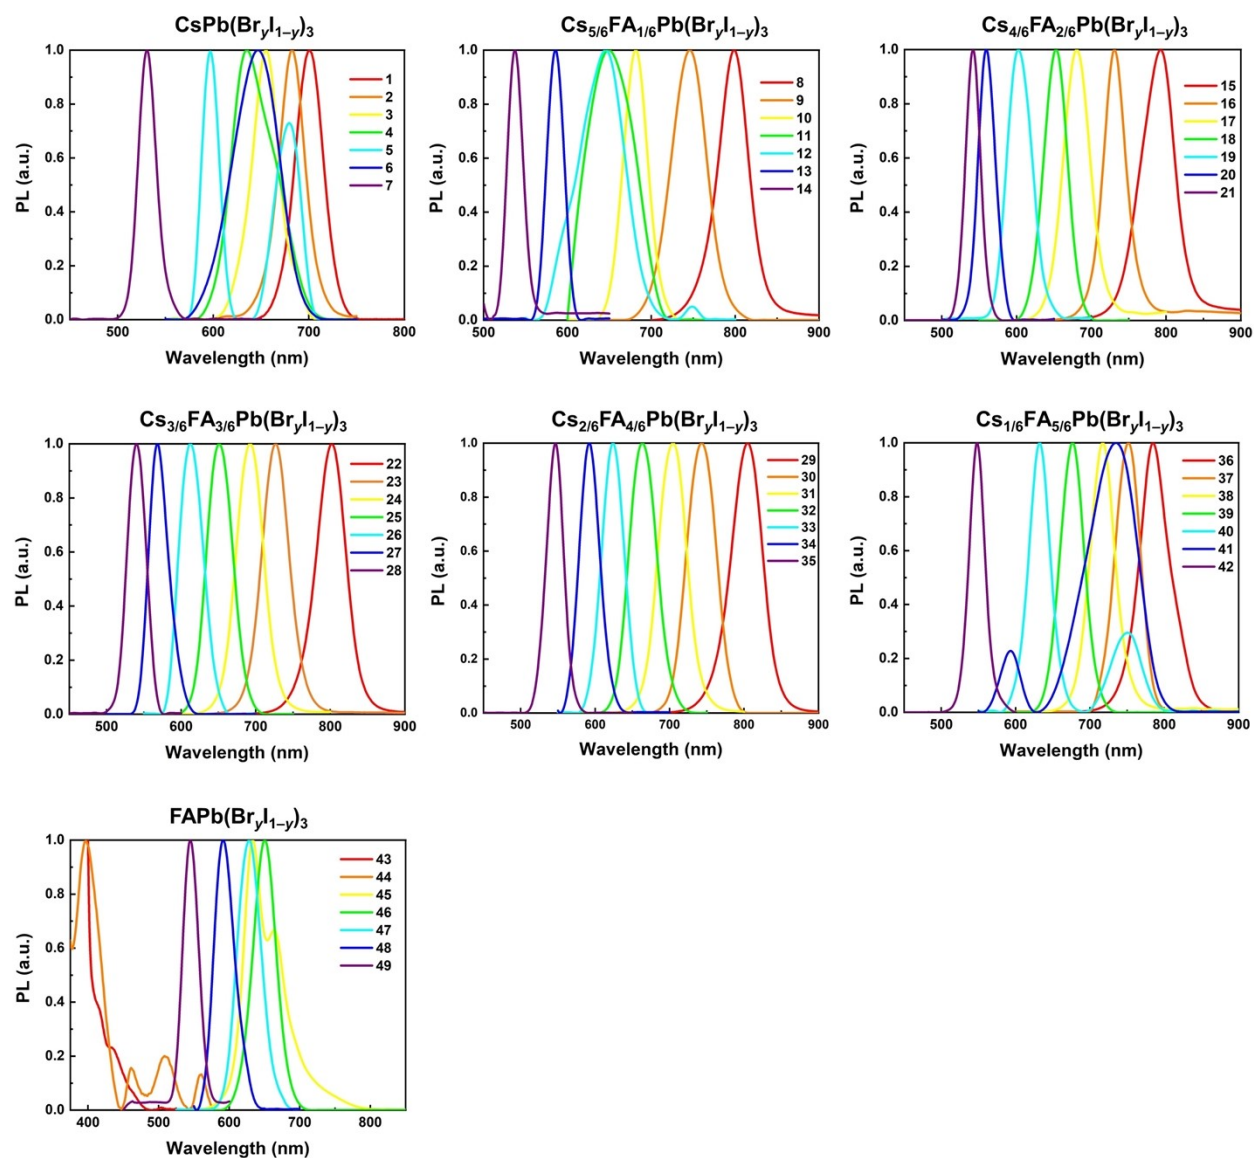

232

233 Fig. S17 Normalized photoluminescence spectra as a function of wavelength. Each figure  
 234 represents a fixed Cs/FA ratio and a changing Br/I ratio, i.e. every row of the composition matrix.

235

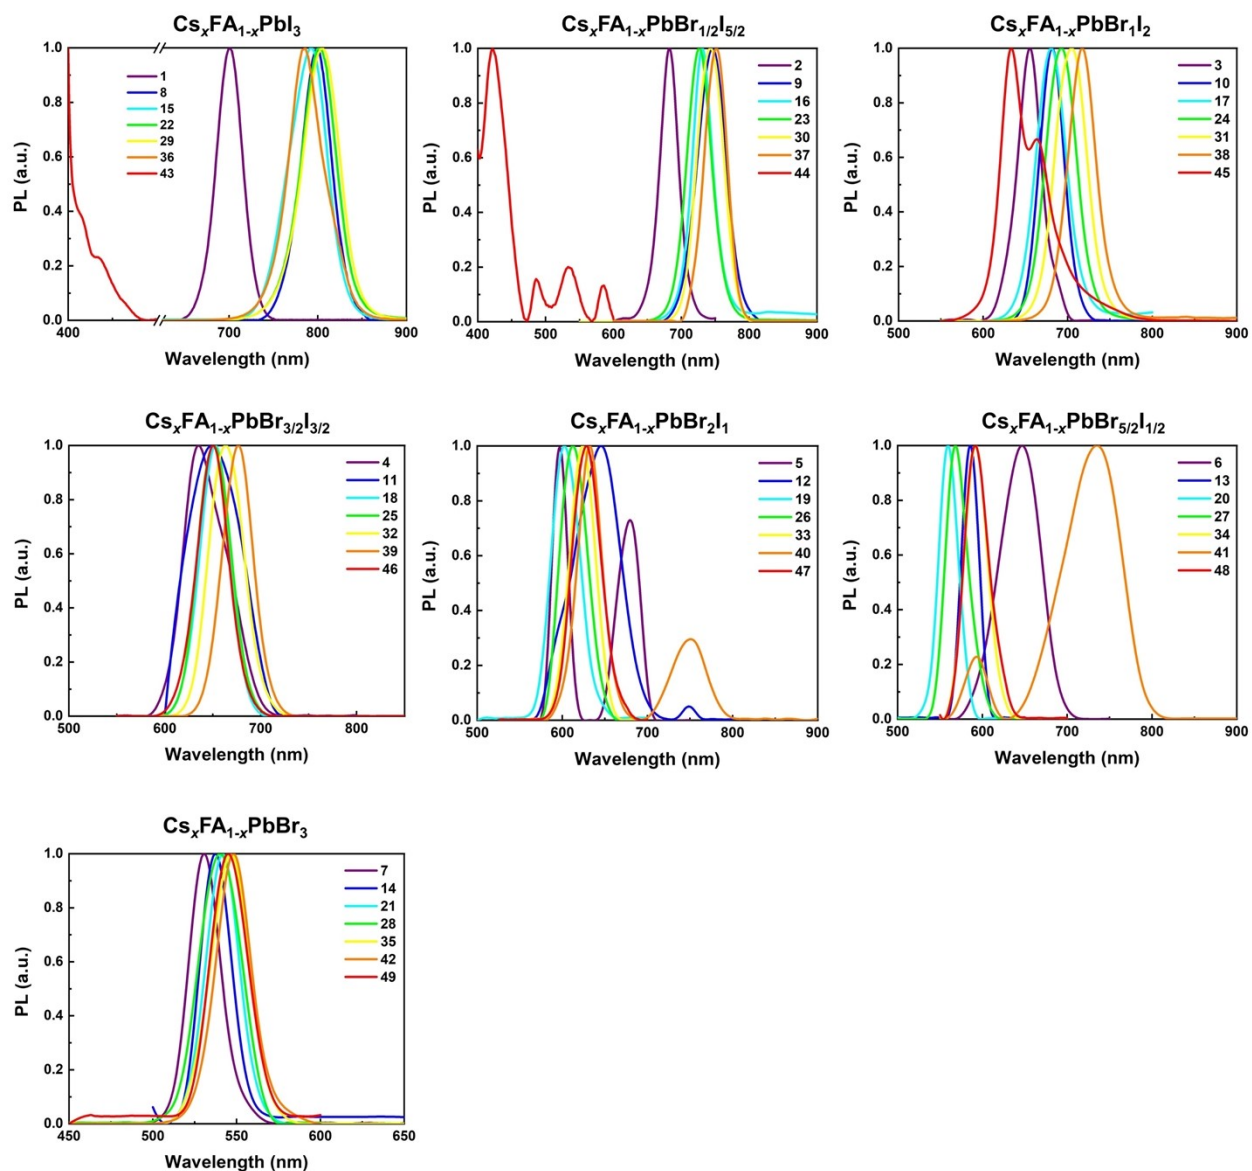

236

237 Fig. S18 Normalized photoluminescence spectra as a function of wavelength. Each figure  
 238 represents a fixed Br/I ratio and a changing Cs/FA ratio, i.e. every column of the composition  
 239 matrix.

240

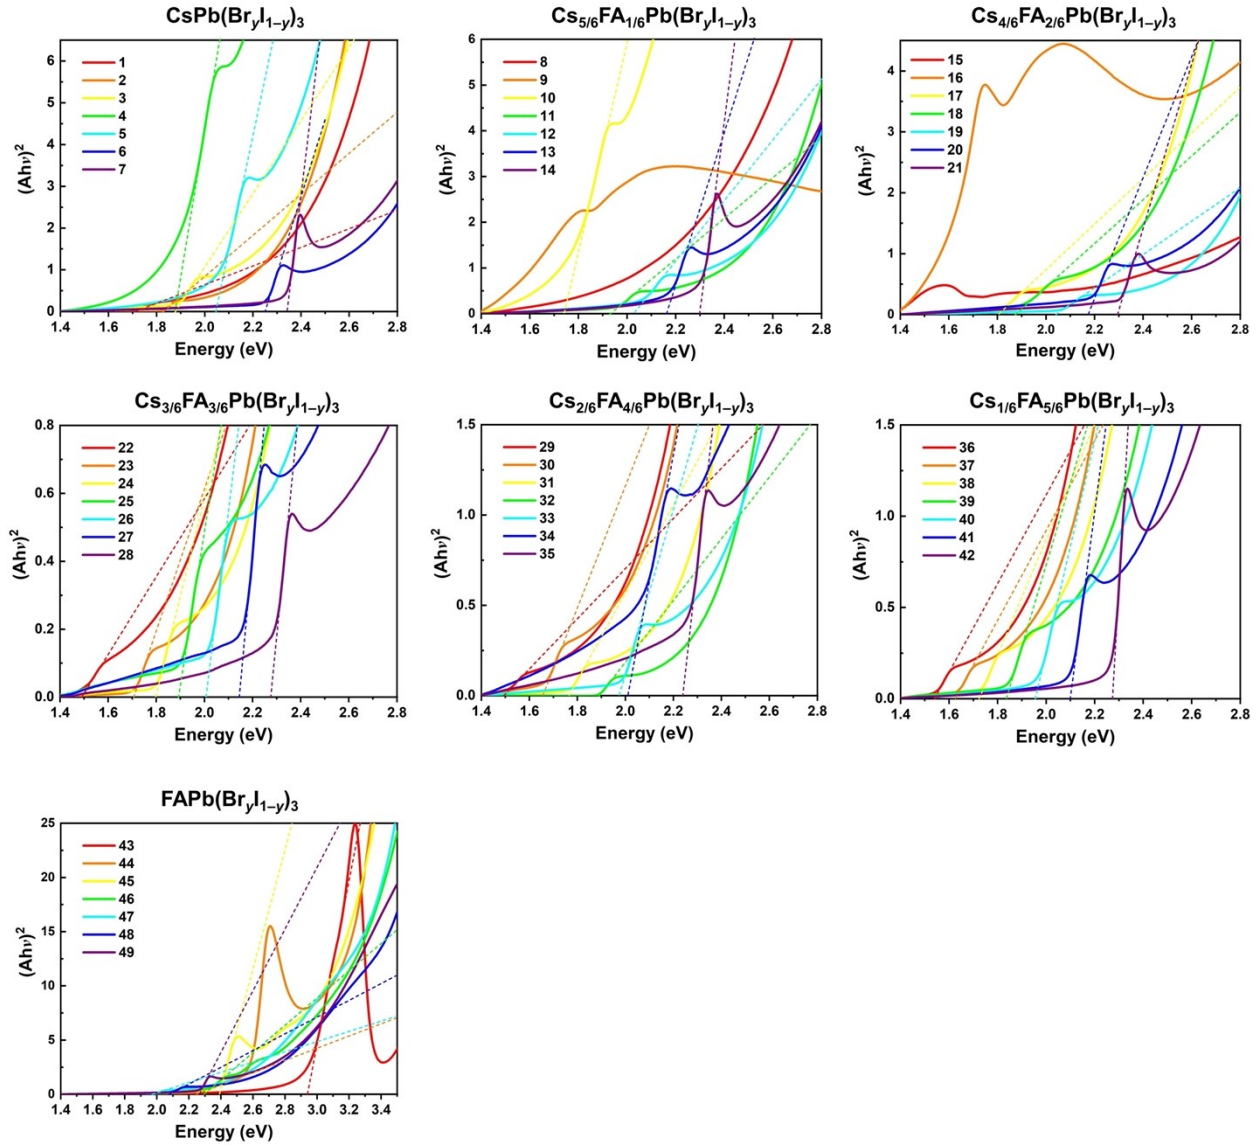

241

242 Fig. S19 Tauc plots based on the square of absorption as a function of photon energy. The bandgaps  
 243 are determined by the intercept between the linear regions close to the absorption onset and the  
 244 intercept. Each figure represents a fixed Cs/FA ratio and a changing Br/I ratio, i.e. every row of  
 245 the composition matrix.

246

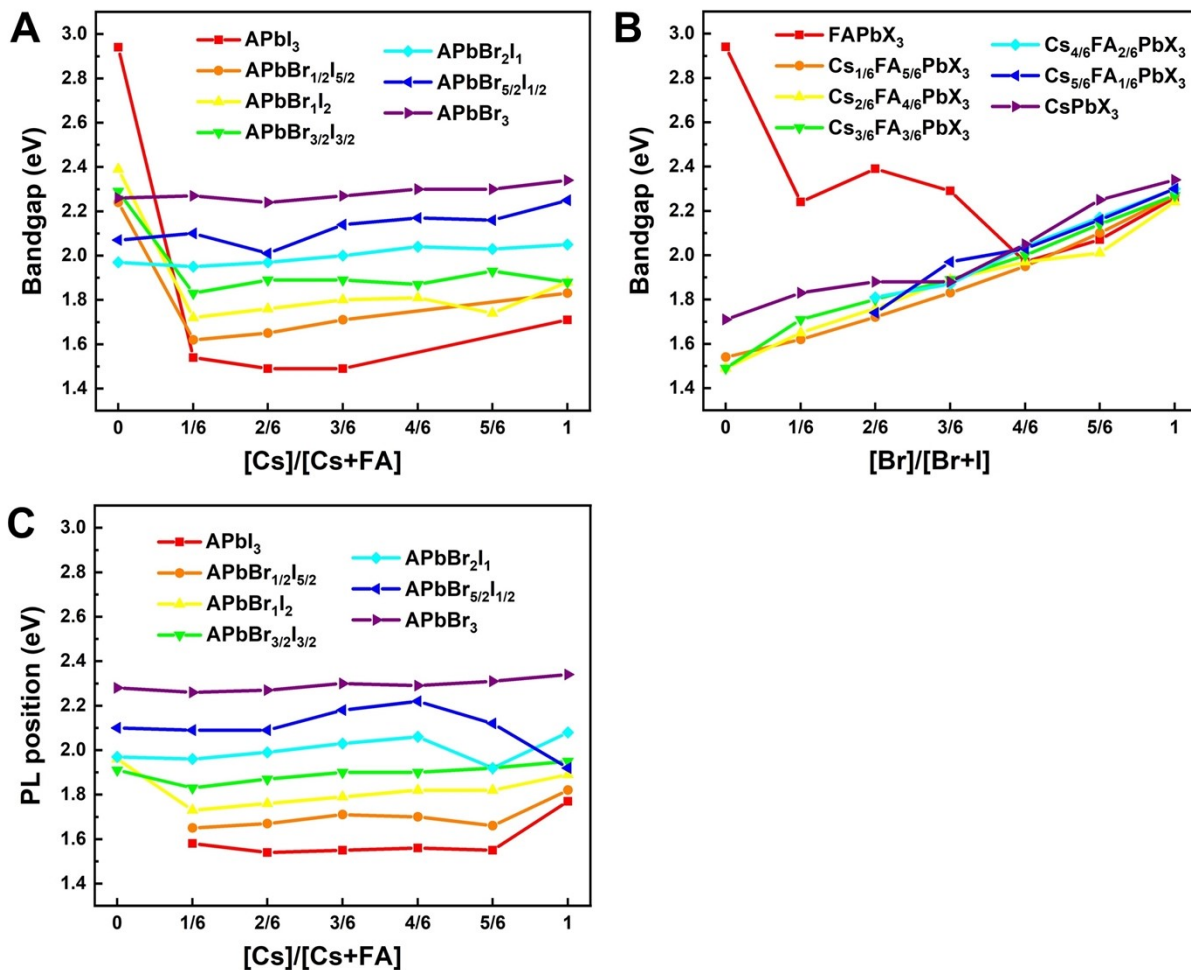

247

248 Fig. S20 Bandgaps as a function of Cs content (A) and Br content (B). Bandgap values were  
 249 calculated from Tauc plots in Fig. S18. (C) The PL energy extracted from the maximum emission  
 250 wavelength of PL as a function of Cs content.

251

252 Table. S1 Values of the coefficients in eqn. (2) of main text with 95% confidence bounds

| Coefficient | Value  | Standard error | Correlation |
|-------------|--------|----------------|-------------|
| $C_1$       | 1.502  | 0.033          | 0.965       |
| $C_2$       | 0.560  | 0.076          | 0.985       |
| $C_3$       | 0.080  | 0.096          | 0.989       |
| $C_4$       | 0.185  | 0.065          | 0.970       |
| $C_5$       | 0.106  | 0.071          | 0.972       |
| $C_6$       | -0.097 | 0.063          | 0.939       |

253 Note:

- 254 1. The model of the fitting second-order polynomial is  $E_g(x, y) = C_1 + C_2 \cdot x + C_3 \cdot y + C_4 \cdot x^2 + C_5 \cdot$   
255  $y^2 + C_6 \cdot x \cdot y$ . The eqn. (2) was fitted by Origin software.
- 256 2. R-square value is also known as the coefficient of determination. The closer the fit is to the  
257 data points, the closer r-square will be to the value of 1. A larger value of r-square does not  
258 necessarily mean a better fit because the degree of freedom can also affect the value. Thus if  
259 more parameters are introduced, the r-square value will rise, but this does not imply a better  
260 fit. The adjusted r-square value accounts for the degrees of freedom to provide a better measure  
261 of the goodness of fit.
- 262



264 Device performance

265

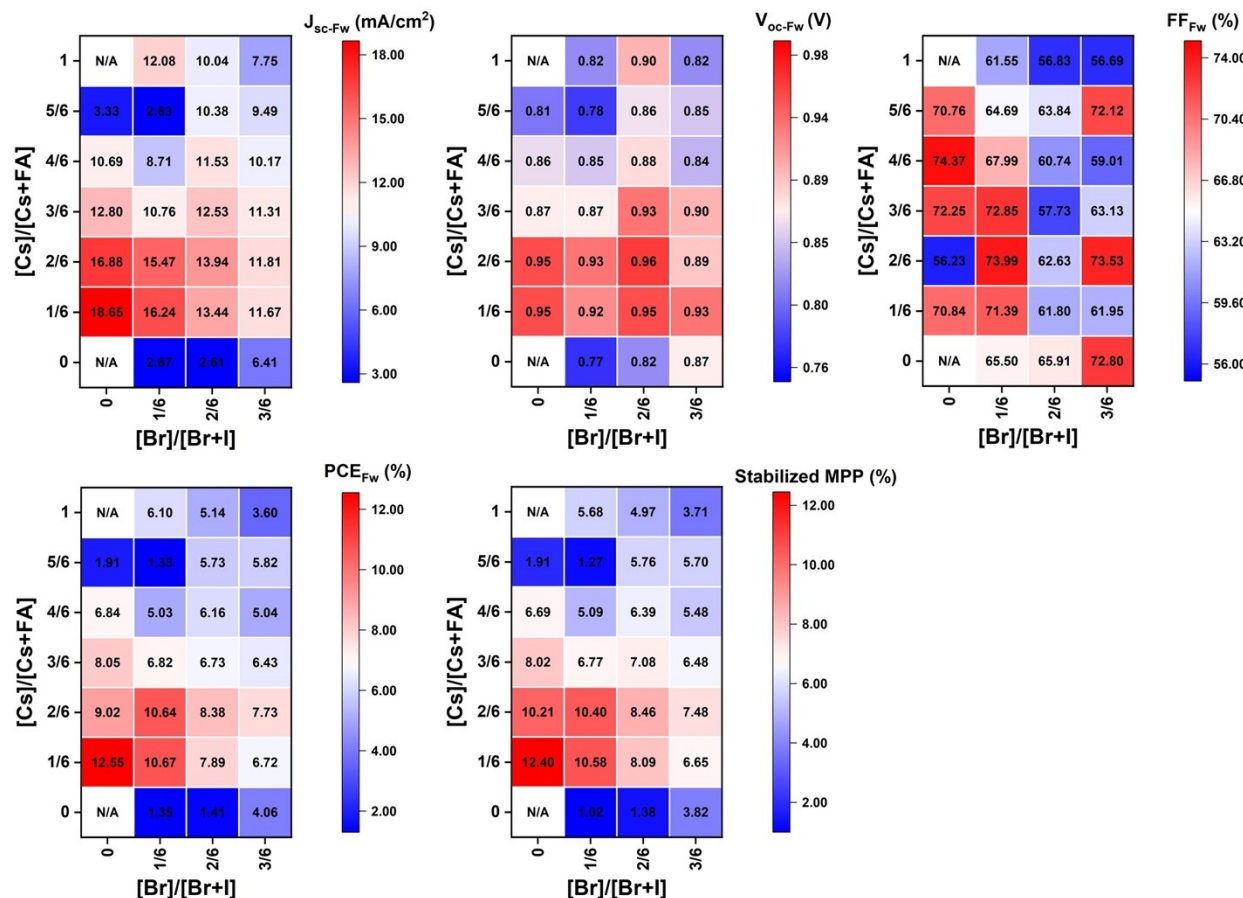

266

267 Fig.S21 The photovoltaic parameters of  $J_{sc}$ ,  $V_{oc}$ , FF, and PCE for forward scan and stabilized power  
268 output at MPP attained from best devices of I-rich compositions using 0.4 M perovskite precursor  
269 solutions.

270

271

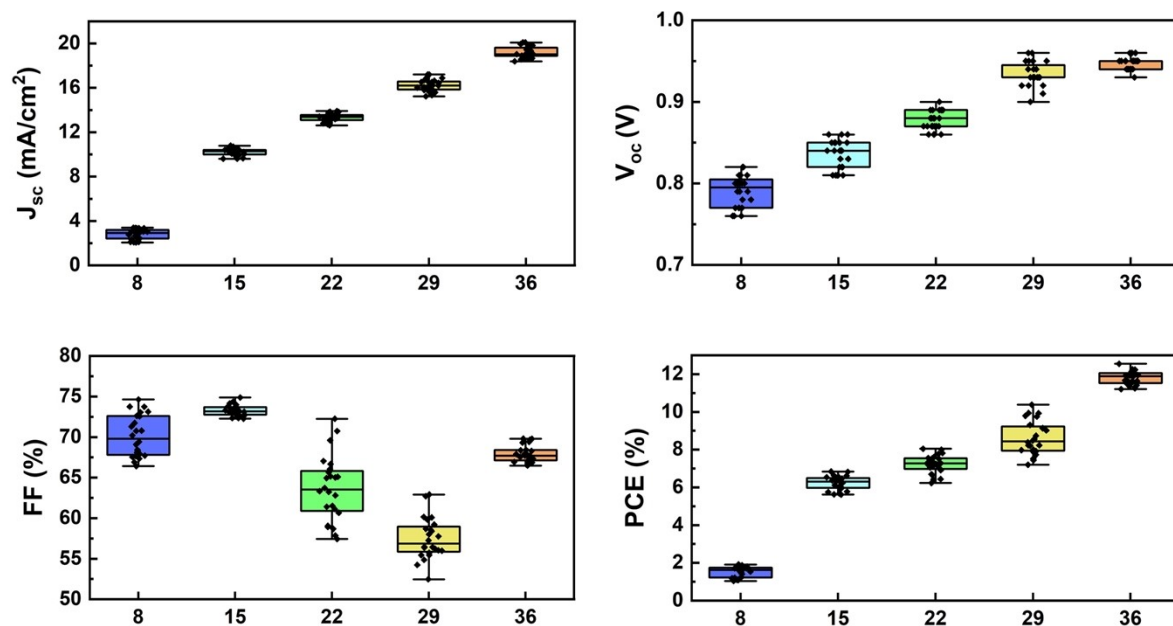

272

273 Fig.S22 Box plots of the photovoltaic parameters of the perovskite solar cells with composition

274  $Cs_yFA_{1-y}PbI_3$ .

275

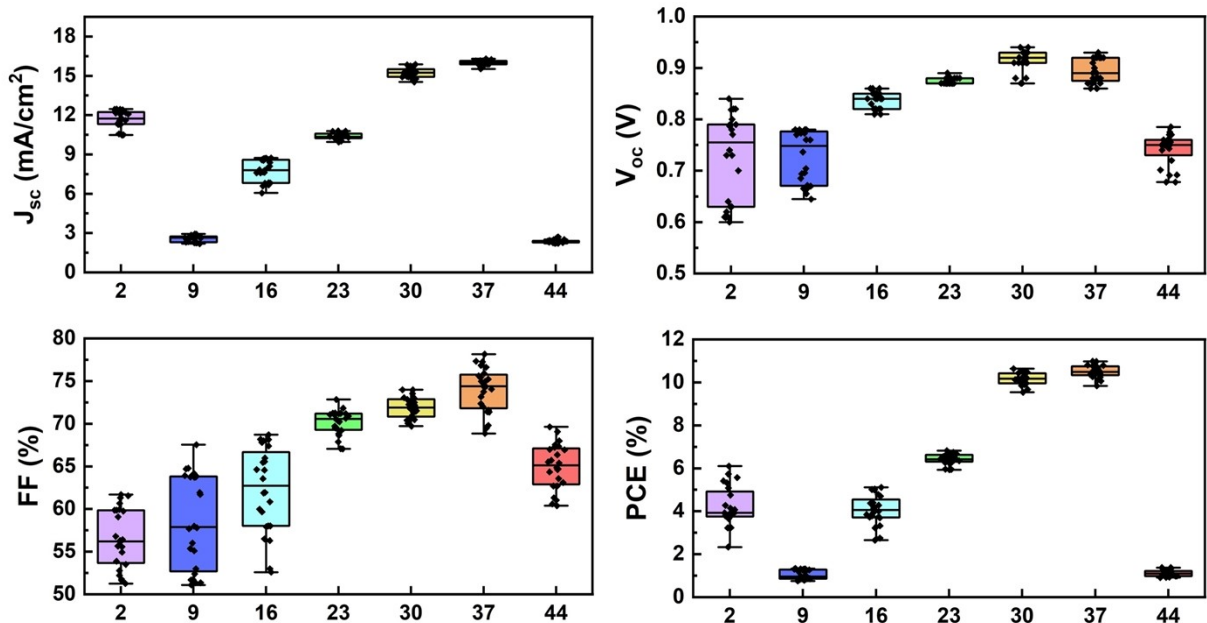

276

277 Fig.S23 Box plots of the photovoltaic parameters of the perovskite solar cells with composition

278  $\text{Cs}_y\text{FA}_{1-y}\text{PbBr}_{1/2}\text{I}_{5/2}$ .

279

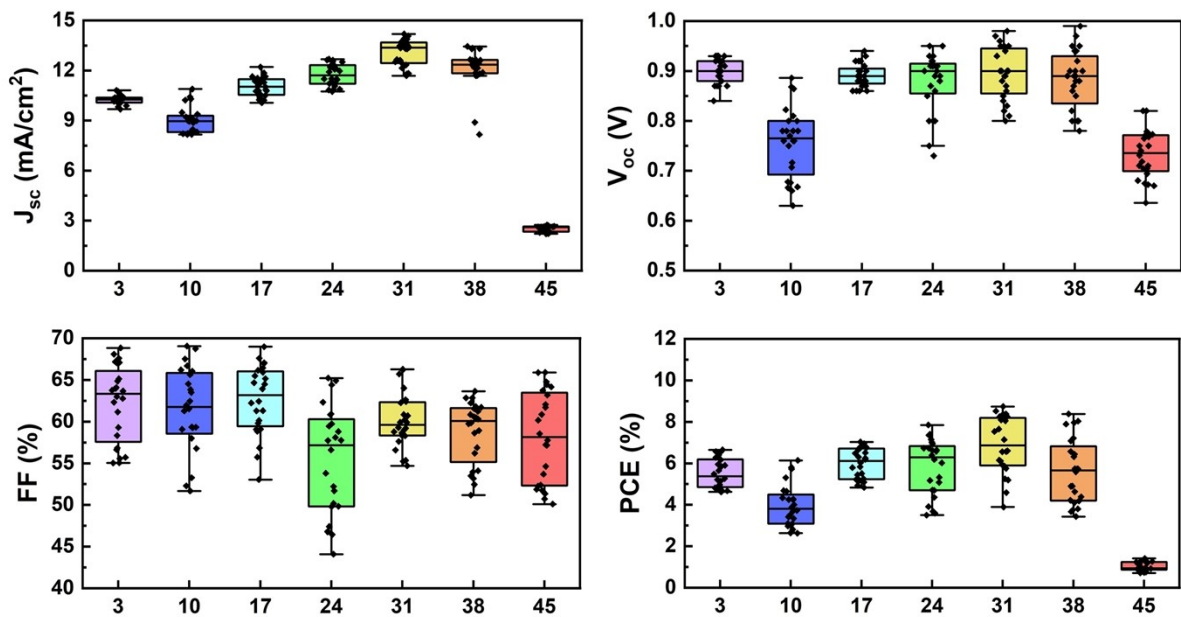

280

281 Fig.S24 Box plots of the photovoltaic parameters of the perovskite solar cells with composition

282  $\text{Cs}_y\text{FA}_{1-y}\text{PbBr}_1\text{I}_2$ .

283

284

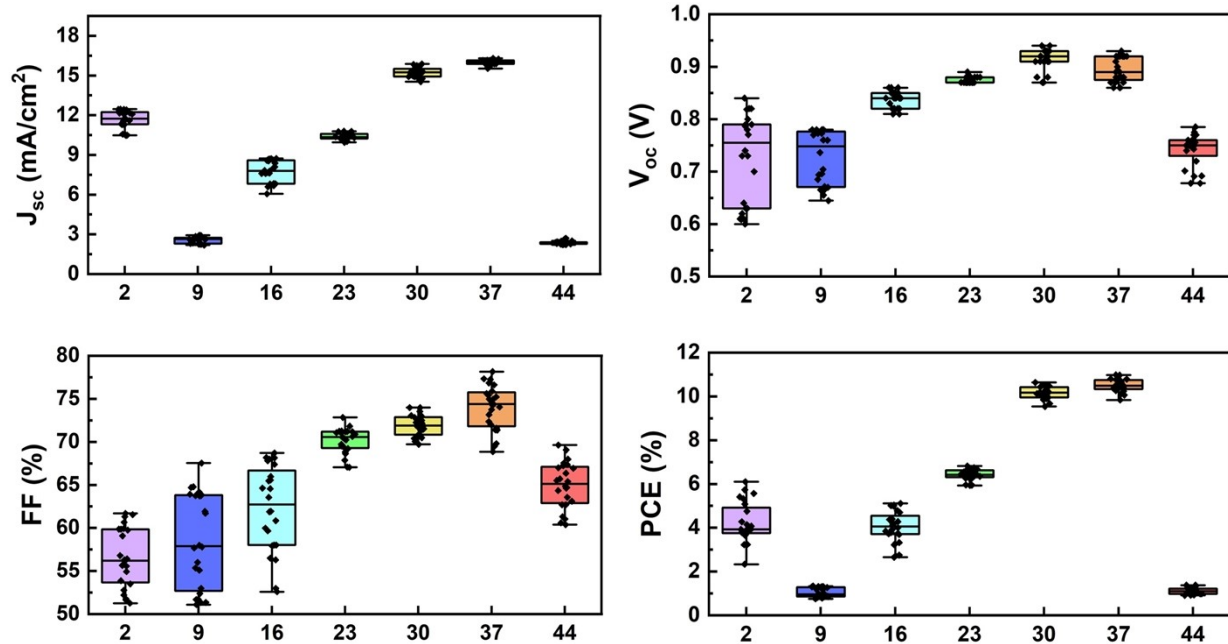

285

286 Fig.S25 Box plots of the photovoltaic parameters of the perovskite solar cells with composition

287  $\text{Cs}_y\text{FA}_{1-y}\text{PbBr}_{3/2}\text{I}_{3/2}$ .

288

289 **Note 1: Additional discussions on texture:**

290 The texture of perovskite crystallites within a film have been proposed to affect the charge carrier  
291 transport and collection properties across the layer, thus influencing the overall photovoltaic  
292 performance of the solar cell stack <sup>14,15</sup>. XRD highlighted a high level of texturing in our films, as  
293 mentioned above, resulting in prominent peaks at  $\sim 14^\circ$  and  $\sim 28^\circ$ . The reason for the orientation  
294 can be traced back to different surface energies for different planes <sup>14</sup>. The texture of a film can  
295 also be monitored looking at the GIWAXS diffraction patterns, tracking the intensity variations of  
296 a specific plane with varying azimuthal angle. The ring at  $q = 1.035 \pm 0.09 \text{ \AA}$  in GIWAXS  
297 corresponds to the peak at  $\sim 14^\circ$  in XRD, and is assigned to the  $(100)_C$  plane for a cubic structure,  
298 to the  $(110)_T$ ,  $(001)_T$  reflections for the tetragonal phase, and to the  $(110)_O$ ,  $(002)_O$  reflections for  
299 the orthorhombic phase. The peak is integrated and plotted as function of the azimuthal angle as  
300 detailed in Fig. S26. Fig. S27 summarizes the preferred facet orientation, as extracted from Fig. S26.  
301 All the 26 I-rich compositions show preferred facet orientation of crystal plane at peak  $q = 1.035$   
302  $\pm 0.09 \text{ \AA}$ , parallel to the substrate ( $0^\circ$ ) or/and stacked along the  $45^\circ$  direction with respect to the  
303 substrate (Fig. S26-S27). This indicates the ordered and long-range-orientated crystallization of  
304 the nineteen I-rich films, which is beneficial for charge transport within the perovskite films, and  
305 consequently device performance <sup>16</sup>. In addition, Fig. S28 schematically demonstrates  $(100)_C$ ,  
306  $(110)_T$ ,  $(001)_T$ ,  $(110)_O$ , and  $(002)_O$  crystal planes, involve only one kind of stacking layer,  
307 composed of Pb and X atoms without A, regardless of the crystal phase. Therefore, the nineteen  
308 I-rich films are long-range-orientated and have same atomic stacking structure for the plane at  
309 peak  $q = 1.035 \pm 0.09 \text{ \AA}$ . The azimuthal angle integration also shows the perovskite films for Cs-  
310 rich compositions are more oriented at  $0^\circ$  than that of FA-rich samples, suggesting higher texture  
311 of Cs-rich compositions, as illustrated in Fig. S26. However, the PCE of Cs-rich compositions is  
312 significantly lower than that of FA-rich compositions. Hence, the impact of the texture on the  
313 device performance is negligible in the face of other factors, e.g., bandgap, surface morphology,  
314 and the existence of  $\delta$ -phase.

315

316

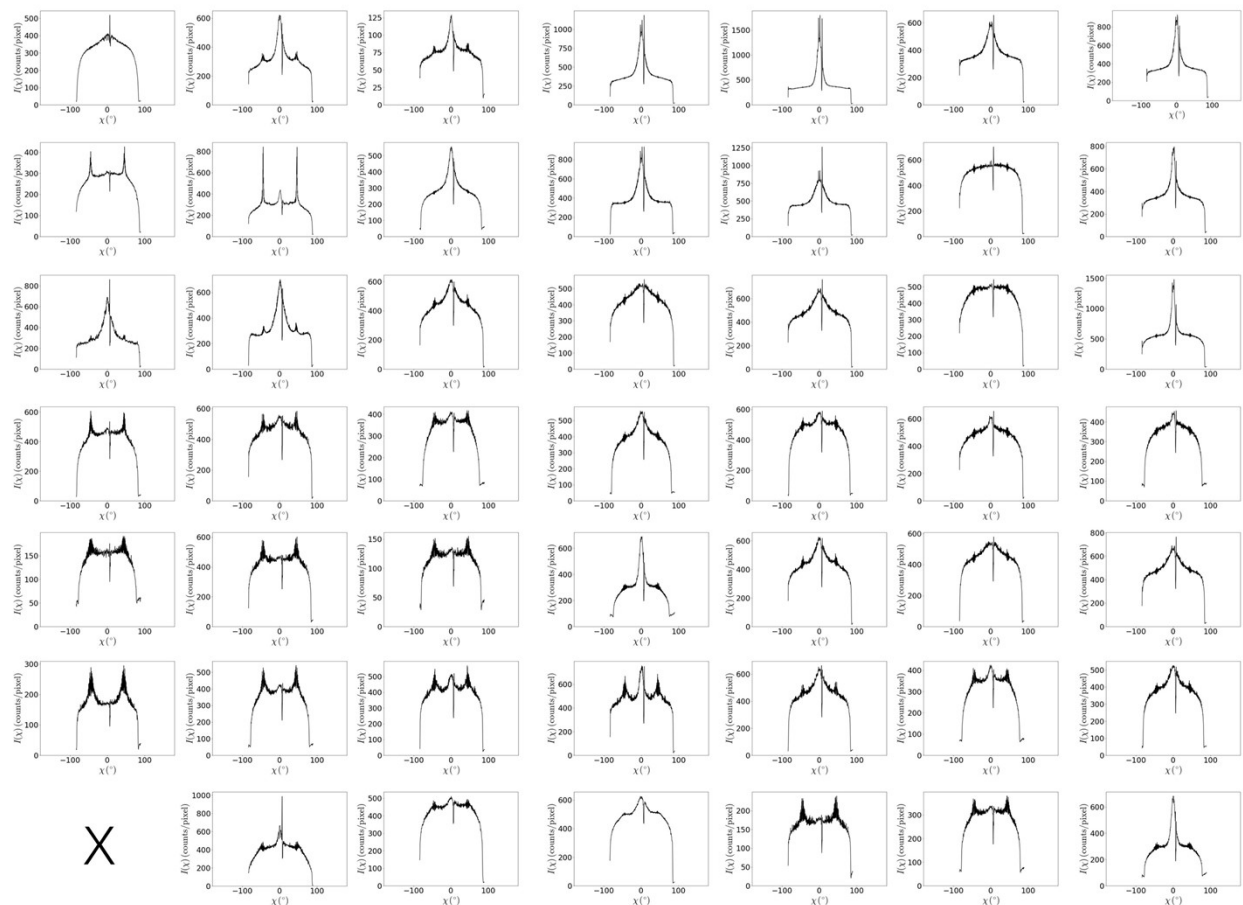

317

318 Fig. S26 Integrated azimuthal angle along the ring  $q$  ( $q = 1.035 \pm 0.09 \text{ \AA}$ ) at an incident angle of  
 319  $0.5^\circ$  corresponding to the location  $\sim 14^\circ$  in XRD, assigned to (100) plane for a cubic structure,  
 320 which plane splits into the (110), (001) reflections and (110), (002) reflections in the tetragonal  
 321 phase and orthorhombic phase, respectively<sup>17</sup>.

322

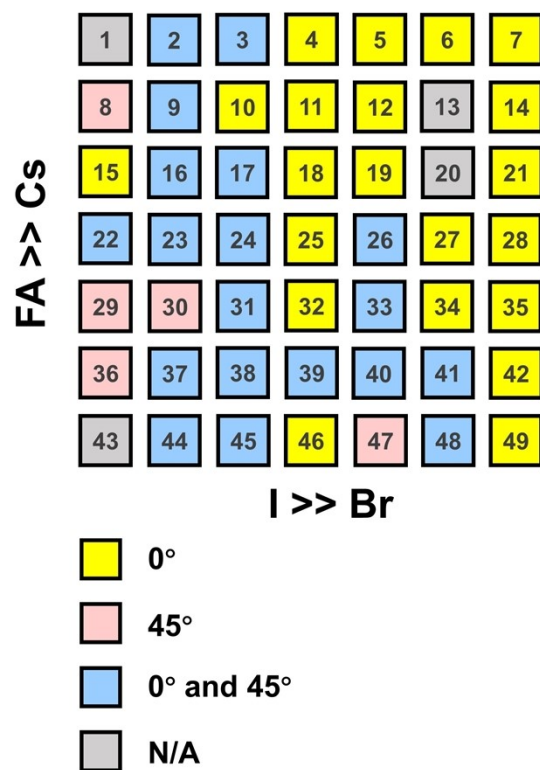

323

324 Fig. S27 Color map of the preferential integrated azimuthal angle along the ring  $q$  ( $q = 1.035 \pm$   
 325  $0.09 \text{ \AA}$ ) to summarize Fig. S25.

326



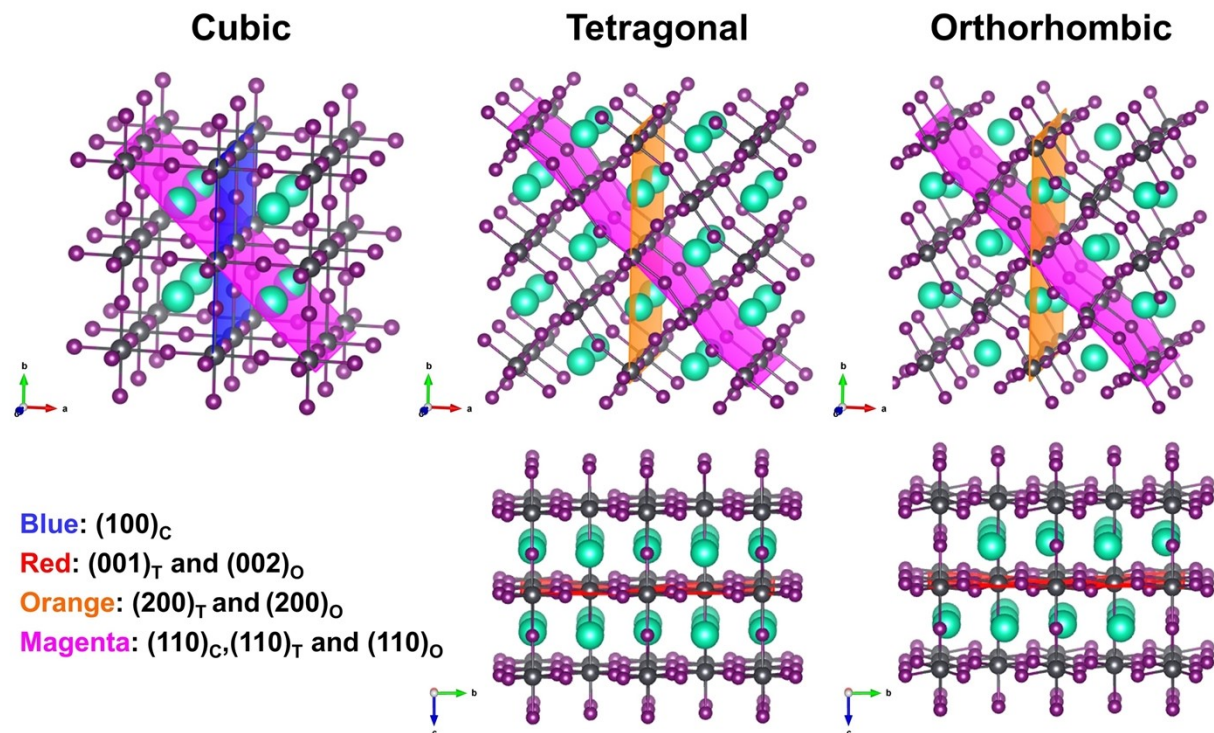

327

328 Fig. S28 Crystal structure models of three perovskite phases, including cubic, tetragonal and  
 329 orthorhombic structure for different planes.

330

331

332

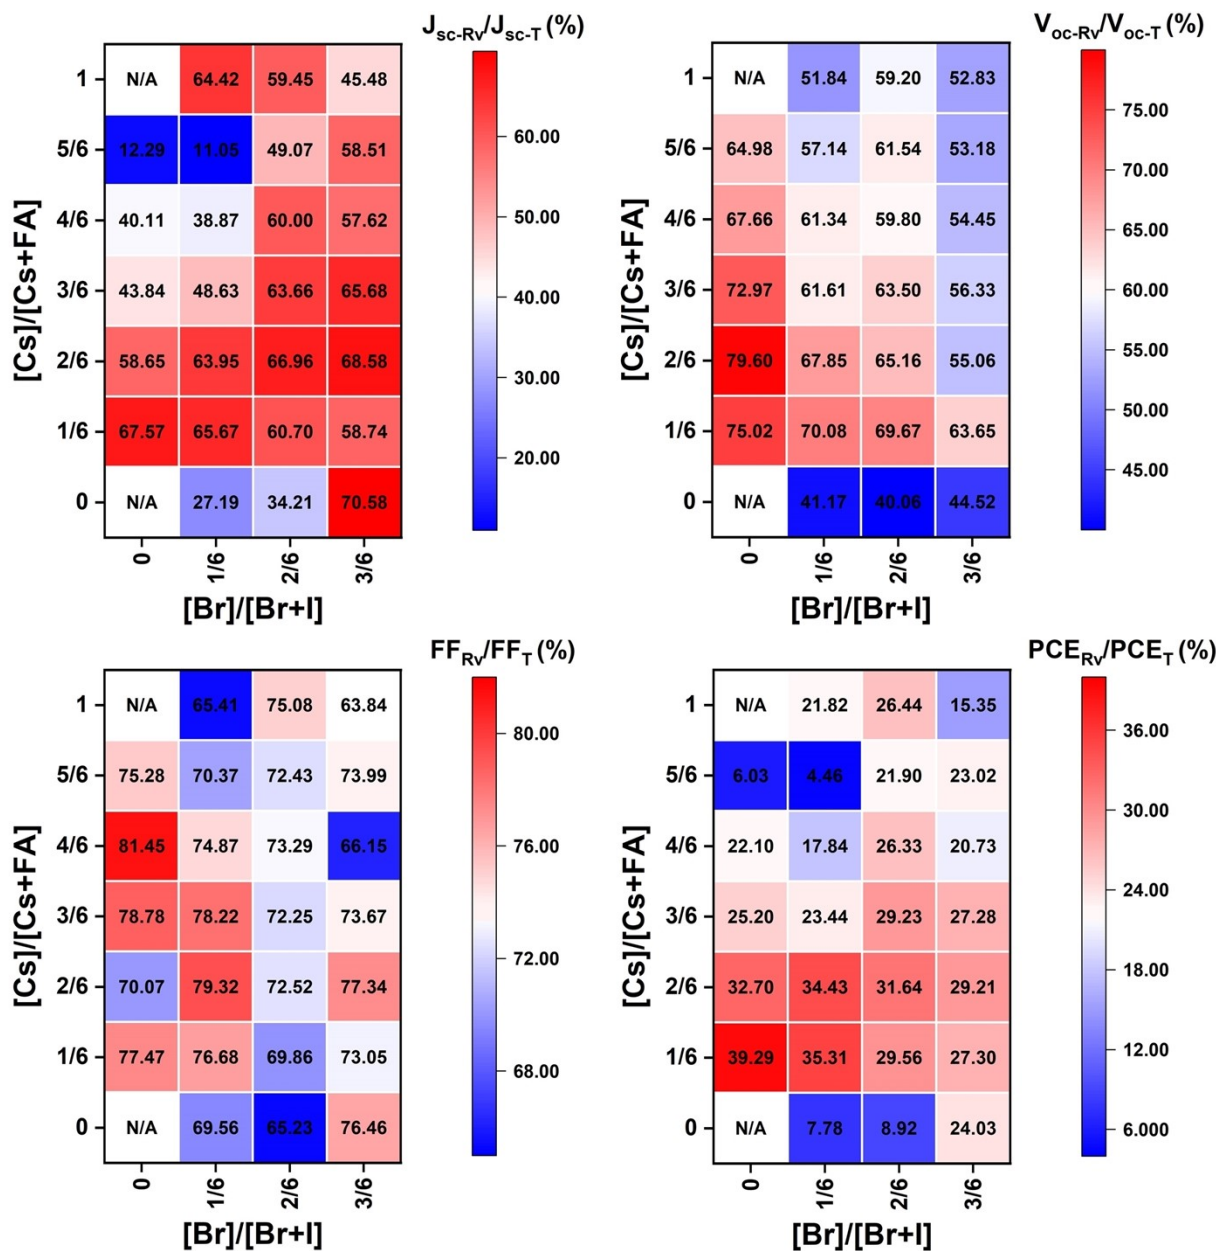

333

334 Fig.S29 The ratio of photovoltaic parameters of  $J_{sc}$ ,  $V_{oc}$ , FF, and PCE for reverse scan from best  
 335 devices of I-rich compositions using 0.4 M perovskite precursor solutions to the corresponding  
 336 theoretical Shockley-Queisser limit<sup>18</sup>.

337

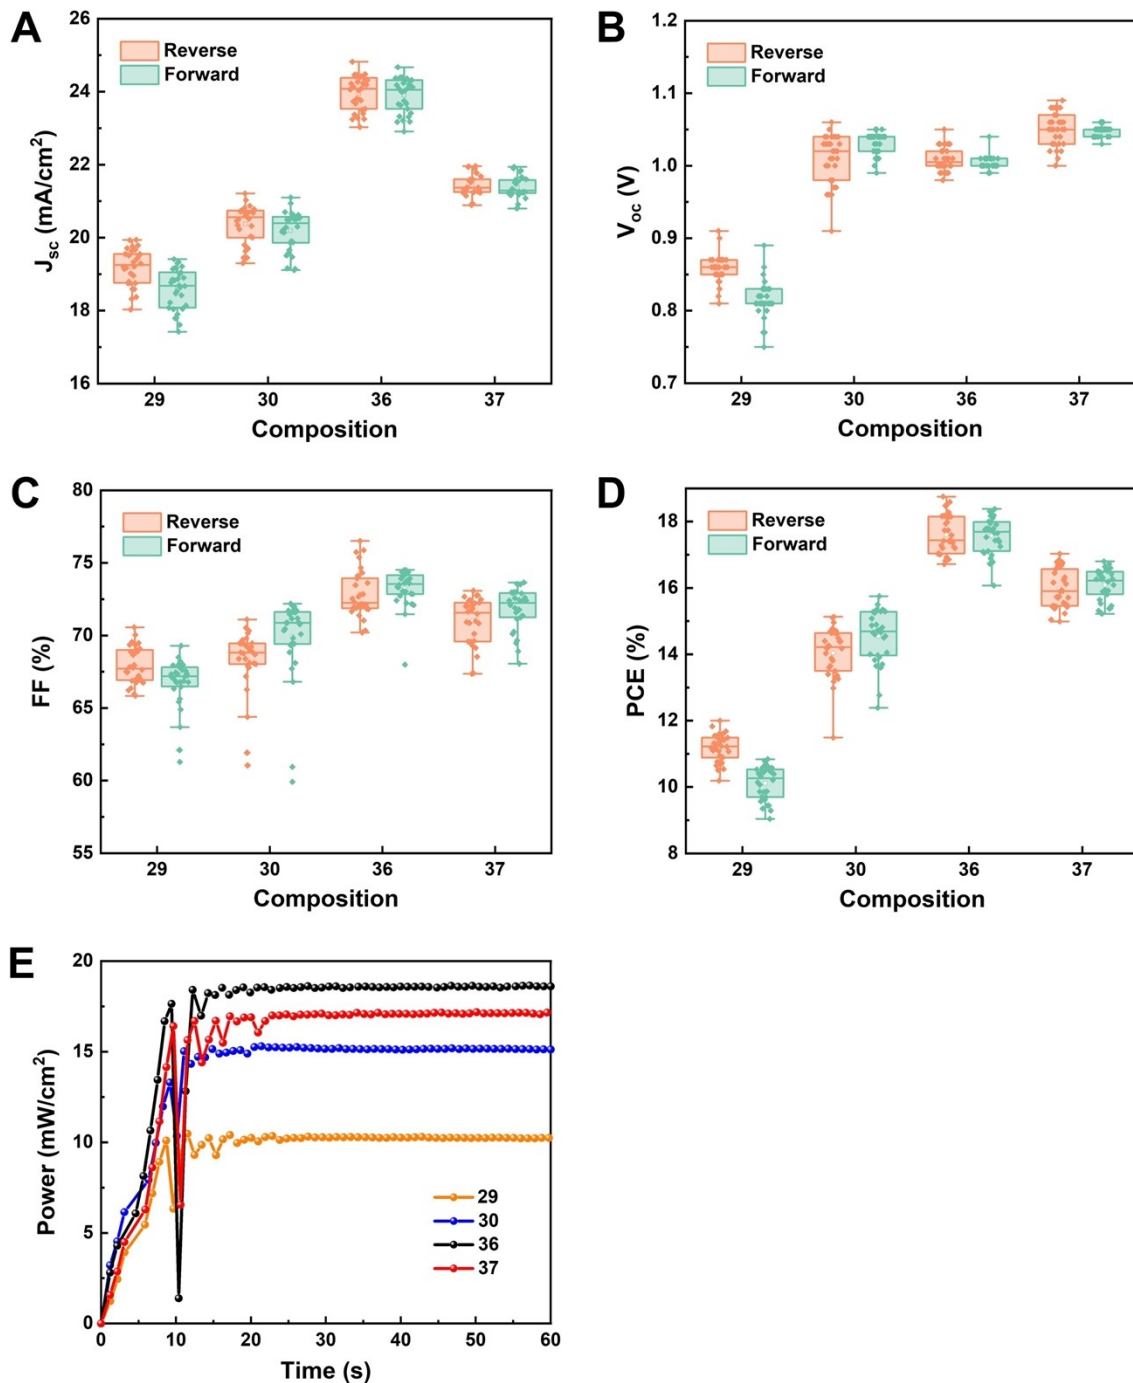

338

339 Fig.S30 Box plots for photovoltaic parameters of  $J_{sc}$  (A),  $V_{oc}$  (B), FF (C), and PCE (D) using 1.0  
 340 M perovskite precursor solutions for composition No 29, No.30, No.36, and No37. (E) The MPP  
 341 tracking for the champion devices.

342

343

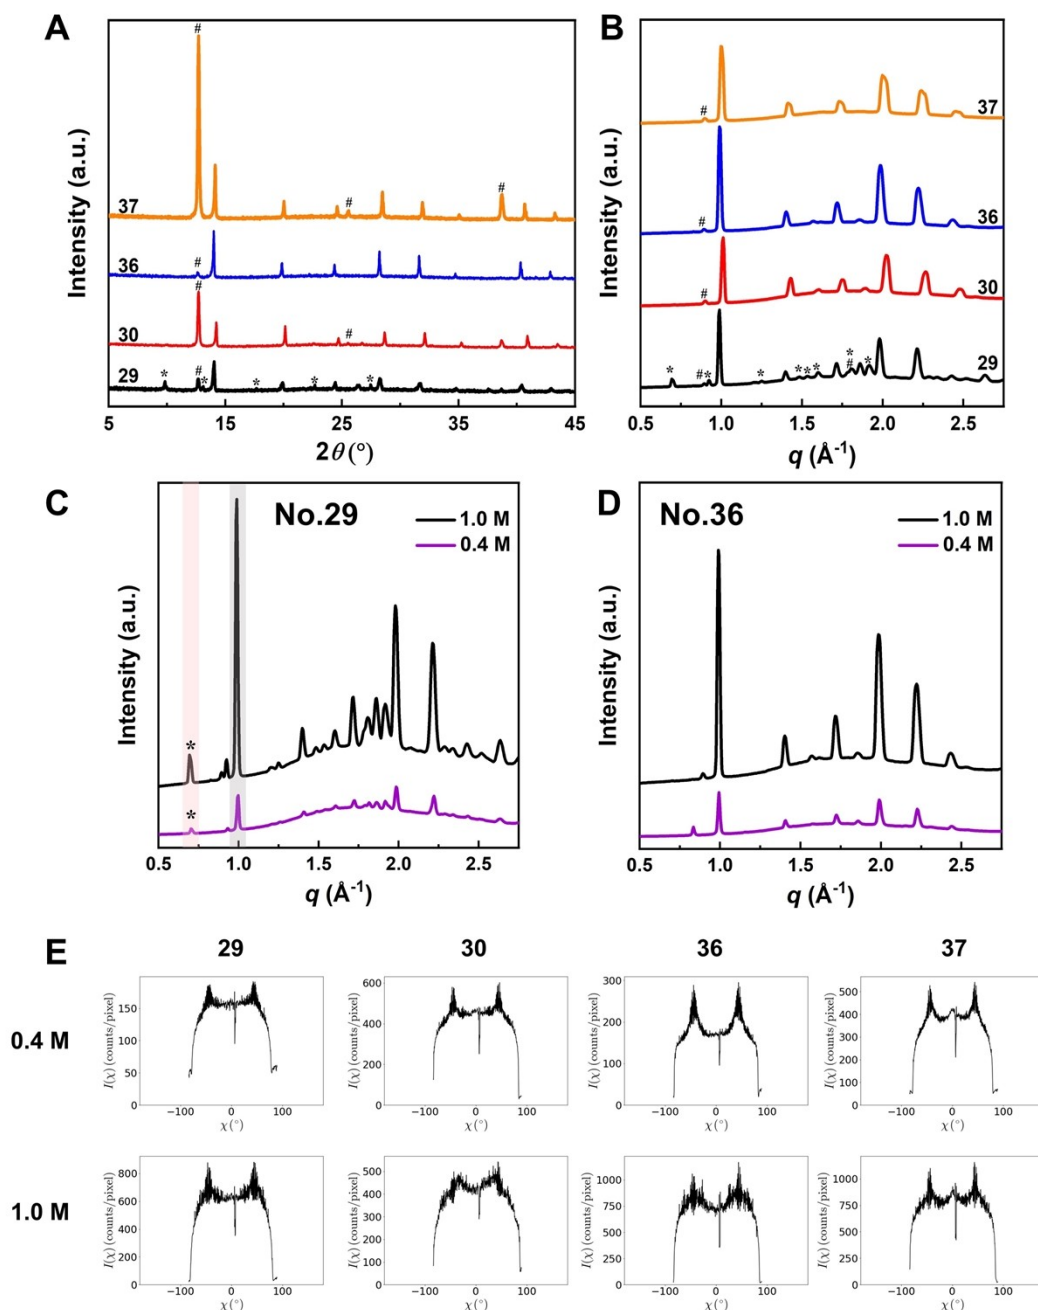

345

Fig.S31 XRD (A) and circular average of GIWAXS (B) patterns for composition No.29, No.30, No.36, and No.37 using 1.0 M perovskite precursor solutions along with the 150  $^{\circ}\text{C}$  annealing. The # and \* denote  $\delta$ -CsPbI<sub>3</sub> and excess PbI<sub>2</sub>, respectively. The GIWAXS comparison of the films with composition No.29 (C) and No. 36 (D) deposited by 0.4 M precursors solution annealing at 65 $^{\circ}\text{C}$  and by 1.0 M precursors solution annealing at 150 $^{\circ}\text{C}$ . (E) Integrated azimuthal angle for

351 composition No.29, No.30, No.36, and No37, deposited by 0.4 M precursors solution annealing at  
352 65°C and by 1.0 M precursors solution annealing at 150°C, along the ring  $q$  ( $q = 1.035 \pm 0.09$  Å)  
353 at an incident angle of  $0.5^\circ$  corresponding to the location  $\sim 14^\circ$  in XRD, assigned to (100) plane  
354 for a cubic structure, which plane splits into the (110), (001) reflections in the tetragonal phase.  
355

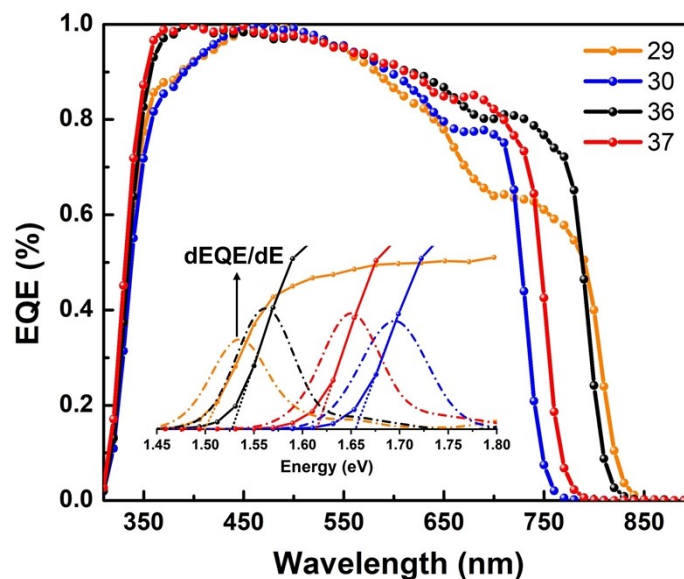

Fig. S32 EQE spectra of the perovskite solar cell for No.29, No.30, No.36, and No.37. The insert showed the photovoltaic bandgap extracted from extrapolation to 0 of the EQE curve or the inflection point of the derivative of the EQE curve.

Table S2. Optical bandgap extracted from absorbance ( $E_g$ ) and PL ( $E_{PL}$ ) as well as the photovoltaic bandgap extracted from EQE spectra measured by solar cells using the extrapolation to 0 of the EQE curve ( $E_0$ ) or the inflection point of the derivative of the EQE curve ( $E_{IP}$ ).

| Composition  | 29   | 30   | 36   | 37   |
|--------------|------|------|------|------|
| $E_g$ /eV    | 1.49 | 1.65 | 1.54 | 1.62 |
| $E_{PL}$ /eV | 1.54 | 1.67 | 1.58 | 1.65 |
| $E_0$ /eV    | 1.50 | 1.65 | 1.53 | 1.61 |
| $E_{IP}$ /eV | 1.53 | 1.70 | 1.56 | 1.65 |

Note: For the mismatch between optical bandgap and photovoltaic bandgap, the optical bandgap determined by the Tauc method represents an internal property of the photovoltaic material while the photovoltaic bandgap determined by the EQE represents an external property of the solar cells. In practice, the device structure and fabrication methods may modify the optoelectronic properties of the device, producing a mismatch between the optical value and photovoltaic bandgap<sup>19,20</sup>.



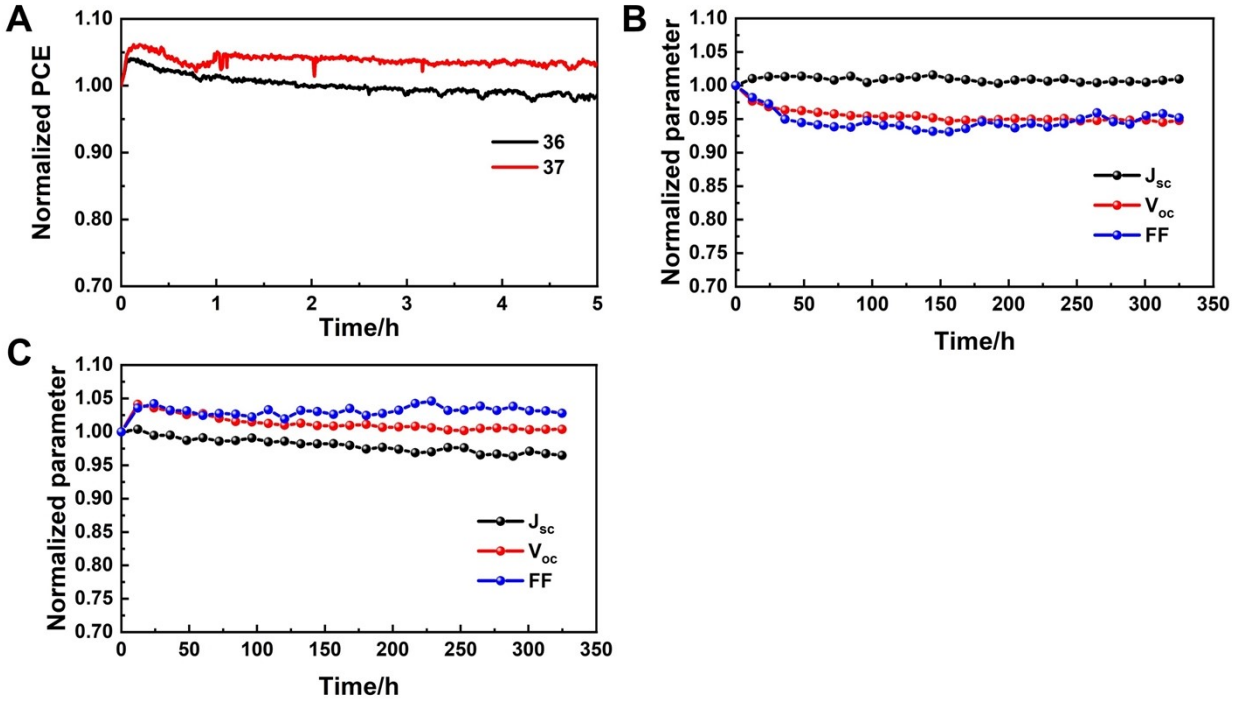

371

372 Fig.S33 (A) Continuous MPP tracking results under 1 sun irradiance at  $N_2$  atmosphere of devices  
 373 of composition 36 and 37 for first 5 hours, which was zoomed from the Fig 10 F in the main text.

374 The evolution of the normalized  $V_{oc}$ ,  $J_{sc}$ , and FF of PSCs for composition No.36 (B) and No.37  
 375 (C) that aged under at MPP with 1 sun irradiation in  $N_2$  atmosphere at room temperature.

376

377

## 378 Reference

- 379 1 J. P. Perdew, A. Ruzsinszky, G. I. Csonka, O. A. Vydrov, G. E. Scuseria, L. A.  
 380 Constantin, X. Zhou and K. Burke, *Phys. Rev. Lett.*, 2008, **100**, 136406.
- 381 2 P. E. Blöchl, *Phys. Rev. B*, 1994, **50**, 17953–17979.
- 382 3 D. Joubert, *Phys. Rev. B - Condens. Matter Mater. Phys.*, 1999, **59**, 1758–1775.
- 383 4 W. A. Saidi and J. J. Choi, *J. Chem. Phys.*, 2016, **145**, 144702.
- 384 5 A. Tkatchenko and M. Scheffler, *Phys. Rev. Lett.*, 2009, **102**, 073005.
- 385 6 W. A. Al-Saidi, V. K. Voora and K. D. Jordan, *J. Chem. Theory Comput.*, 2012, **8**, 1503–  
 386 1513.
- 387 7 W. Shan and W. A. Saidi, *J. Phys. Chem. Lett.*, 2017, **8**, 5935–5942.
- 388 8 W. A. Saidi, W. Shadid and I. E. Castelli, *npj Comput. Mater.*, 2020, **6**, 1–7.
- 389 9 C. C. Stoumpos, C. D. Malliakas and M. G. Kanatzidis, *Inorg. Chem.*, 2013, **52**, 9019–  
 390 9038.
- 391 10 B. Zhao, S. F. Jin, S. Huang, N. Liu, J. Y. Ma, D. J. Xue, Q. Han, J. Ding, Q. Q. Ge, Y.  
 392 Feng and J. S. Hu, *J. Am. Chem. Soc.*, 2018, **140**, 11716–11725.
- 393 11 A. Marronnier, G. Roma, S. Boyer-Richard, L. Pedesseau, J.-M. M. Jancu, Y.  
 394 Bonnassieux, C. Katan, C. C. Stoumpos, M. G. Kanatzidis and J. Even, *ACS Nano*, 2018,  
 395 **12**, 3477–3486.
- 396 12 M. Rodová, J. Brožek, K. Knížek and K. Nitsch, *J. Therm. Anal. Calorim.*, 2003, **71**, 667–  
 397 673.
- 398 13 G. A. Elbaz, D. B. Straus, O. E. Semonin, T. D. Hull, D. W. Paley, P. Kim, J. S. Owen, C.  
 399 R. Kagan and X. Roy, *Nano Lett.*, 2017, **17**, 1727–1732.
- 400 14 Z. Xu, Z. Liu, N. Li, G. Tang, G. Zheng, C. Zhu, Y. Chen, L. Wang, Y. Huang, L. Li, N.  
 401 Zhou, J. Hong, Q. Chen and H. Zhou, *Adv. Mater.*, 2019, **31**, 1900390.
- 402 15 J. Hidalgo, C. A. R. Perini, A. F. Castro-Mendez, D. Jones, H. Köbler, B. Lai, R. Li, S.  
 403 Sun, A. Abate and J. P. Correa-Baena, *ACS Energy Lett.*, 2020, **5**, 3526–3534.
- 404 16 G. Zheng, C. Zhu, J. Ma, X. Zhang, G. Tang, R. Li, Y. Chen, L. Li, J. Hu, J. Hong, Q.  
 405 Chen, X. Gao and H. Zhou, *Nat. Commun.*, 2018, **9**, 1–11.
- 406 17 J. A. Vigil, A. Hazarika, J. M. Luther and M. F. Toney, *ACS Energy Lett.*, 2020, **5**, 2475–  
 407 2482.
- 408 18 S. Rühle, *Sol. Energy*, 2016, **130**, 139–147.

409 19 O. Almora, C. I. Cabrera, J. Garcia-Cerrillo, T. Kirchartz, U. Rau and C. J. Brabec, *Adv.*  
410 *Energy Mater.*, 2021, **11**, 2100022.  
411 20 L. Krückemeier, U. Rau, M. Stolterfoht and T. Kirchartz, *Adv. Energy Mater.*, 2020, **10**,  
412 1902573.  
413
